# Supplementary material for: Cold induces brain region-selective cell activity-dependent lipid metabolism
Source: eLife. 2025 Jan 30;13:RP98353. doi: 10.7554/eLife.98353 (PMC11781799; doi:10.7554/eLife.98353)
Supplement: Figure 1—figure supplement 1—source data 1. [file elife-98353-fig1-figsupp1-data1.xlsx]

## Sheet: Figure 1-supplement 1 source da
Figure 1-Supplement 1 source data 1A			Figure 1-Supplement 1 source data 1B			Figure 1-Supplement 1 source data 1C			Figure 1-Supplement 1 source data 1D			Figure 1-Supplement 1 source data 1E
Ctrl	Cold		Ctrl	Cold		Ctr	Cold		Ctr	Cold		Ctr	Cold
0.89	2.76		0.63	1.36		0.8	1.02		1.03	0.7		0.95	1.39
0.79	1.18		0.79	1.5		1.24	0.69		0.98	0.82		1.05	2.26
0.6	1.01		1.14	1.41		1.1	1.06		0.62	0.71		0.87	0.92
2.37	1.16		1.76	0.41		0.91	1.43		1.62	1.35		1.15	0.66
1.02	1.11		1.18	1.1			1.61			0.94			1.2
0.98	3.06		0.84	0.83			1.4			0.46			2.36
	1.26			0.81			0.79			1.12			2.58
	0.82			0.58			0.94			1.16			1.61
	1.39			1.36
	1.84			2.64
	2.8			1.06
	3.15			1.16
