# Supplementary material for: Cold induces brain region-selective cell activity-dependent lipid metabolism
Source: eLife. 2025 Jan 30;13:RP98353. doi: 10.7554/eLife.98353 (PMC11781799; doi:10.7554/eLife.98353)
Supplement: Figure 1—source data 1. [file elife-98353-fig1-data1.xlsx]

## Sheet: Figure-1 source data
Figure 1-A1			Figure 1-A2			Figure 1-A3			Figure 1-A4			Figure 1-A5
Ctrl	Cold		Ctrl	Cold		Ctr	Cold		Ctr	Cold		Ctr	Cold
1.31	1.31		0.65	1.63		0.99	1.82		0.77	1.6		1.32	0.7
1.18	1.53		0.65	0.85		1.01	1.61		1.29	1.29		0.76	1.1
0.6	1.98		1.03	1.94		1.03	1.58		0.82	2.96		1.07	1.07
1.07	2.61		2.27	1.89		0.97	1.86		1.21	4.4		0.94	2.21
1.6	3.03		1	1.66		0.75	0.98		0.76	1.26		0.88	1.3
0.63	3.28		1	2.29		0.79	0.66		0.8	0.36		0.74	1.04
	1.47			0.81		1.68	1.38		1.64	2.79		1.52	1.97
	1.68			1.79			1			3.71			2.7
	3.01			2.7
	2.69			2.56
	7.35			3.01
				4.81
Figure 1-B1			Figure 1-B2			Figure 1-B3			Figure 1-B4			Figure 1-B5
Ctrl	Cold		Ctrl	Cold		Ctr	Cold		Ctr	Cold		Ctr	Cold
0.93	1.34		0.98	1.38		0.75	1.79		0.87	0.73		0.66	1.54
1.07	1.26		1.02	0.92		1.33	1.72		1.15	1.61		1.51	1.31
0.87	2.29		0.81	1.8		0.97	2.63		0.8	0.74		1.05	1.32
1.15	0.68		1.24	0.66		1.03	2.28		1.25	0.6		0.95	0.98
0.5	1		0.42	1.7		0.5	1.59		0.43	0.82		0.6	1
1.75	1.03		1.56	1.21		1.62	1.01		1.7	1.54		1.46	1.01
1.15	1.21		1.53	0.66		1.24	1.77		1.36	0.58		1.15	1.12
	0.81			1.34
Figure 1-C1			Figure 1-C2			Figure 1-C3			Figure 1-C4			Figure 1-C5
Ctrl	Cold		Ctrl	Cold		Ctr	Cold		Ctr	Cold		Ctr	Cold
0.98	1.13		1.41	3.19		0.58	3.05		0.57	3.51		0.59	2.69
1.02	1.57		0.71	1.76		1.72	1.71		1.76	1.07		1.7	1.45
0.67	2.29		1.22	0.81		0.81	3.34		0.88	3.79		0.75	2.29
1.5	2.02		0.82	1.46		1.24	16.77		1.14	15.1		1.34	12.05
0.79	1.74		0.7	3.81		0.89	1.36		0.92	1.74		1.04	1.18
1.04	1.88		1.09	0.61		1.13	1.38		1.06	0.82		1.25	0.89
1.22	0.86		1.3	0.76		0.99	7.28		1.02	8.71		0.77	7.58
	1.11						4.3			2.35			3.04
Figure 1-D1			Figure 1-D2			Figure 1-D3			Figure 1-D4			Figure 1-D5
Ctrl	Cold		Ctrl	Cold		Ctr	Cold		Ctr	Cold		Ctr	Cold
0.99	0.82		1.15	0.42		0.95	0.46		2.13	0.38		1.22	0.43
1.01	1.42		0.87	1.15		1.05	0.62		0.47	0.23		0.82	0.2
1.15	0.32		0.95	0.69		0.93	1.82		1.15	1.03		0.93	0.77
0.87	0.53		1.05	1.03		1.08	1.15		0.87	1.14		1.08	0.99
0.75	1.69		0.99	0.71		1.08	0.76		0.88	0.51		1.53	0.54
1.53	1.93		0.8	1.06		0.79	1.21		0.82	0.7		0.82	0.67
0.87	1.11		1.27	1.05		1.18	2.54		1.38	1.21		0.79	1.34
	0.83			0.71			3.66			1.92			1.55
Figure 1-E1			Figure 1-E2			Figure 1-E3			Figure 1-E4			Figure 1-E5
Ctrl	Cold		Ctrl	Cold		Ctr	Cold		Ctr	Cold		Ctr	Cold
1.05	1.84		1.13	1.74		1.19	2.26		1.49	2.14		1.48	2.16
0.95	2.06		0.88	1.48		0.84	1.32		0.67	0.61		0.68	0.6
0.58	9.86		0.48	0.09		1.2	1.86		1.04	2.09		1.18	0.96
1.72	5.67		2.07	1.2		0.83	2.23		0.96	1.95		0.85	1.47
0.84	1.89		0.9	1.06		1.1	1.45		0.96	1.14		1.18	0.65
1.27	2.12		0.92	1.77		1.14	1.3		1.11	0.86		1.17	1.05
0.93	6.78		1.21	0.27		0.8	2.14		0.93	2.1		0.72	2.13
	3.5			0.17			1.29			1.44			0.59
