# Supplementary material for: Cold induces brain region-selective cell activity-dependent lipid metabolism
Source: eLife. 2025 Jan 30;13:RP98353. doi: 10.7554/eLife.98353 (PMC11781799; doi:10.7554/eLife.98353)
Supplement: Figure 2—source data 1. [file elife-98353-fig2-data1.xlsx]

## Sheet: Figure-2 source data
Figure 2B			Figure 2C
Control	Cold		Control	Cold
44.75	58.75		13.85	12.92
38.5	52.6		8.54	13.87
32.9	74.13		9.507	31.63
25	69.45		5.57	20.54
29.5	67.15		11.11	34.49
