# Supplementary material for: Cold induces brain region-selective cell activity-dependent lipid metabolism
Source: eLife. 2025 Jan 30;13:RP98353. doi: 10.7554/eLife.98353 (PMC11781799; doi:10.7554/eLife.98353)
Supplement: Figure 3—source data 1. [file elife-98353-fig3-data1.xlsx]

## Sheet: Figure 3-source data B
Figure 3B					Figure 3C
Control	Cold				Control	Cold
15	31.65				6.823	5.46
18.47	48.05				7.115	12.16
12.4	23.6				5.59	11.99
14.23	38.47				4.895	18.63
12.3	42.75				6.62	10.94
