# Supplementary material for: Cold induces brain region-selective cell activity-dependent lipid metabolism
Source: eLife. 2025 Jan 30;13:RP98353. doi: 10.7554/eLife.98353 (PMC11781799; doi:10.7554/eLife.98353)
Supplement: Figure 4—source data 3. [file elife-98353-fig4-data3.xlsx]

## Sheet: Figure 4-source data 2
		Figure 4B
		Control	Cold
		0.018	0.155
		0.118	0.163
		0.139	0.236
		0.191	0.235
		0.044	0.331
		0.027	0.267
