# Supplementary material for: Cold induces brain region-selective cell activity-dependent lipid metabolism
Source: eLife. 2025 Jan 30;13:RP98353. doi: 10.7554/eLife.98353 (PMC11781799; doi:10.7554/eLife.98353)
Supplement: Figure 5—figure supplement 1—source data 1. [file elife-98353-fig5-figsupp1-data1.xlsx]

## Sheet: Figure 5-supplement 1
Figure 5-supplement 1B				Figure 5- supplement 1C
Control	Cold			Control	Cold
9.367	29.03			10.85	12.35
13.73	24.55			11.27	9.85
8.4	23.05			12.5	5.7
18.95	47.1			10.7	10.1
