# Supplementary material for: Cold induces brain region-selective cell activity-dependent lipid metabolism
Source: eLife. 2025 Jan 30;13:RP98353. doi: 10.7554/eLife.98353 (PMC11781799; doi:10.7554/eLife.98353)
Supplement: Figure 5—figure supplement 2—source data 1. [file elife-98353-fig5-figsupp2-data1.xlsx]

## Sheet: Figure 5-supplement 2
Figure 5-supplement 2
Ctr	Cold
1.39823	0.192353
0.805083	0.739333
0.796689	0.257053
