# Supplementary material for: Cold induces brain region-selective cell activity-dependent lipid metabolism
Source: eLife. 2025 Jan 30;13:RP98353. doi: 10.7554/eLife.98353 (PMC11781799; doi:10.7554/eLife.98353)
Supplement: Figure 5—source data 1. [file elife-98353-fig5-data1.xlsx]

## Sheet: Figure 5-source data C
Figure 5C
Ctr	Cold
0.981269	2.79867
1.03329	2.04859
0.882372	2.88986
1.53741	3.32527
0.782575	2.75115
0.783089	2.50712
