# Supplementary material for: Cold induces brain region-selective cell activity-dependent lipid metabolism
Source: eLife. 2025 Jan 30;13:RP98353. doi: 10.7554/eLife.98353 (PMC11781799; doi:10.7554/eLife.98353)
Supplement: Figure 6—source data 1. [file elife-98353-fig6-data1.xlsx]

## Sheet: Figure 6-source data 1
Figure 6B
Ctr	Cold
17.33	25.67
15.5	32.33
15.5	25
16.33	24.67
22.67	36.67
