# Supplementary material for: Cold induces brain region-selective cell activity-dependent lipid metabolism
Source: eLife. 2025 Jan 30;13:RP98353. doi: 10.7554/eLife.98353 (PMC11781799; doi:10.7554/eLife.98353)
Supplement: Figure 7—figure supplement 1—source data 1. [file elife-98353-fig7-figsupp1-data1.xlsx]

## Sheet: Figure 7-supplement 1
Figure 7- supplement 1B						Figure 7- supplement 1C								Figure 7- supplement 1D						Figure 7- supplement 1E
						Time (min)	Animal 1	Animal 2	Animal 3	Animal 4										Vehicle	KYN+MUS
	0.752779					-10	1.0082	1.00158	1.00953	0.948197					Vehicle	KYN+MUS				0.843373	0.361446
	0.75159						1.00422	0.998455	0.998516	1.0313					0.541051	1.00392				1.44578	0.722892
	0.75169					0	0.987584	0.99997	0.991953	1.0205					0.496597	0.803581				0.963855	0.120482
	0.751203						1.02281	1.00137	1.00919	0.999642					0.481657	0.606416
	0.751483					10	1.03189	1.02344	1.02646	1.08869					0.536095	0.80191
	0.752341						1.0552	1.02527	1.03724	1.1402					0.4922	0.987018
	0.751832					20	1.07973	1.03142	1.05001	1.09983					0.49006	0.929055
	0.750121						1.09177	1.0676	1.06021	1.07357					0.564304	0.586253
	0.750007					30	1.08221	1.05252	1.06479	1.07078					0.507314	0.58155
	0.75038						1.09749	1.04613	1.06829	1.04812					0.468577	0.696787
	0.749216					40	1.07761	1.04657	1.06255	1.04938					0.520246	0.833994
	0.748724						1.08362	1.03738	1.065	1.04437					0.463009	0.856137
	0.748632					50	1.09971	1.0672	1.07106	1.05107					0.513134	0.684339
	0.748908						1.10487	1.06661	1.06314	1.05166					0.507591	0.488455
	0.748317					60	1.09904	1.04474	1.05832	1.03874					0.487824	0.5141
	0.748786						1.10447	1.0548	1.06573	1.02939					0.444958	0.721857
	0.750533					90	1.1244	1.06992	1.07655	1.01141					0.451991	0.709486
	0.749991						1.12772	1.05262	1.06883	0.993975					0.465047	0.769489
	0.749501														0.444349	0.594199
	0.749165														0.414528	0.394694
	0.748392														0.470823	0.368288
	0.747985														0.350185	0.42863
	0.748084														0.50536	0.425578
	0.748147														0.983173	0.499493
	0.747838														0.409474	0.616359
	0.747191														-0.0807304	0.629157
	0.746425														0.117897	0.374865
	0.747227														0.149197	0.206221
	0.747657														0.110867	0.265762
	0.746655														0.159253	0.540589
	0.745913														0.256665	0.563653
	0.74589														0.311654	0.577157
	0.745765														0.347418	0.562827
	0.746636														0.331317	0.411451
	0.746378														0.276121	0.229302
	0.745581														0.323192	0.29854
	0.746226														0.278472	0.38457
	0.747494														0.333047	0.55878
	0.747365														0.285213	0.552933
	0.74499														0.256638	0.30779
	0.745823														0.258328	0.218371
	0.745697														0.260546	0.117164
	0.745302														0.305553	0.218062
	0.745975														0.216013	0.343194
	0.745434														0.309561	0.371156
	0.744913														0.305576	0.2665
	0.744634														0.289035	0.373037
	0.743737														0.286487	0.310023
	0.7442														0.354095	0.174331
	0.743389														0.208217	0.0643651
	0.743381														0.255325	0.251579
	0.742338														0.254001	0.381765
	0.742828														0.2933	0.254505
	0.742415														0.206333	0.190844
	0.742127														0.296487	-0.0415343
	0.741077														0.331841	-0.0104197
	0.741854														0.266223	0.180422
	0.74207														0.338328	0.285313
	0.741441														0.247365	0.343942
	0.742767														0.369059	0.145507
	0.742617														0.202637	0.102469
	0.741601														0.35684	0.0723027
	0.741404														0.253372	0.0876129
	0.742262														0.187506	0.0801863
	0.741991														0.235327	0.0338175
	0.740149														0.250505	0.0100351
	0.740614														0.16268	0.0912376
	0.741432														0.188422	0.247732
	0.741123														0.177275	0.242073
	0.739979														0.123268	0.0387623
	0.739691														0.181386	-0.195965
	0.739269														0.176907	-0.128071
	0.737944														0.135574	0.084127
	0.738379														0.144725	0.192036
	0.73939														0.0744339	0.0909083
	0.740325														0.10121	-0.164227
	0.740107														0.126823	-0.155034
	0.738913														0.105422	-0.0954756
	0.738665														0.13038	0.0291257
	0.73956														0.124686	-0.0181179
	0.741216														0.153414	-0.170451
	0.74191														0.125861	-0.0803193
	0.742381														0.130552	-0.107129
	0.743396														0.163078	-0.0487571
	0.744274														0.153029	-0.103007
	0.744724														0.0975921	-0.0830861
	0.745176														0.0682003	-0.181074
	0.745572														0.111226	-0.0925879
	0.745083														0.109208	0.00537523
	0.741918														0.0498005	0.144496
	0.74066														-0.0287211	0.0674329
	0.739964														0.0798089	-0.0901653
	0.741124														0.0304138	-0.214617
	0.740993														0.0860802	-0.200118
	0.741334														0.0796479	-0.165397
	0.739986														0.00429074	-0.166182
	0.739046														0.0154565	-0.222766
	0.73963														0.0572666	-0.148175
	0.740237														0.108989	0.00050031
	0.739844														0.0220132	-0.0007224
	0.73903														0.0298394	-0.0893763
	0.73875														0.127965	-0.232032
	0.739373														0.461721	-0.249687
	0.73871														-0.0394842	-0.205335
	0.73818														-0.0752762	-0.283202
	0.737828														0.0280615	-0.282447
	0.737879														0.162662	-0.266575
	0.738098														0.0219821	-0.203776
	0.738323														0.0947704	-0.0304373
	0.737704														0.133367	0.0151401
	0.737003														0.0955831	-0.0437397
	0.738692														0.0143128	-0.047035
	0.738365														0.0654787	-0.0988929
	0.738322														0.114607	-0.0866344
	0.737141														-0.0050898	-0.0893733
	0.736481														0.00127675	-0.0649724
	0.736025														0.0299791	-0.0829961
	0.735809														0.0074057	-0.0167009
	0.736197														0.0884105	0.0627778
	0.737082														-0.0116288	-0.0203376
	0.737387														0.0485155	-0.0847165
	0.737128														0.0838112	-0.0911472
	0.736072														0.0290253	-0.0851634
	0.736273														0.029154	-0.0795057
	0.735987														0.0694084	-0.0736329
	0.735955														0.0750504	-0.0374743
	0.735532														0.0321451	-0.0679381
	0.737121														-0.0262709	-0.179119
	0.736598														-0.0094033	-0.196312
	0.736457														0.0321703	-0.128493
	0.736849														0.0285205	-0.142606
	0.736921														0.0851764	-0.13956
	0.736342														0.043541	-0.126055
	0.735579														0.0450286	-0.0656114
	0.734491														-0.0205256	-0.116959
	0.736024														0.0248708	-0.166269
	0.736834														0.0630613	-0.166922
	0.736588														0.00982026	-0.181192
	0.736863														0.0463301	-0.0546371
	0.736087														0.0494982	0.0977319
	0.737593														0.0539281	-0.0372284
	0.736172														0.0296597	-0.0769103
	0.736893														-0.0308834	-0.0670234
	0.737838														-0.058953	-0.0850711
	0.737613														0.0113395	-0.0413295
	0.737866														-0.023537	-0.0970865
	0.739246														-0.0367719	-0.0462746
	0.738576														-0.073424	-0.0557753
	0.739109														-0.0110206	-0.103542
	0.739202														-0.0389443	-0.0709561
	0.73985														0.00386822	0.0144907
	0.740011														-0.0028001	-0.023698
	0.740834														-0.0053715	-0.0782506
	0.742885														-0.0433912	-0.0563395
	0.743936														-0.0289423	-0.0306643
	0.744088														-0.0242518	-0.119857
	0.744782														-0.0543944	-0.0533164
	0.743953														-0.0473487	-0.0823479
	0.74436														0.00962639	-0.0255583
	0.74648														0.175938	-0.0123916
	0.747654														0.441024	-0.10075
	0.749136														-0.270465	-0.102572
	0.748231														-0.0999469	-0.189001
	0.745084														-0.218547	-0.14939
	0.74133														-0.237721	-0.120068
	0.740994														-0.228377	-0.115865
	0.739666														-0.138105	0.00723311
	0.738793														-0.183239	-0.0346456
	0.738913														-0.197326	-0.085503
	0.738792														-0.196925	-0.177161
	0.737129														-0.202773	-0.158931
	0.736837														-0.207398	-0.12598
	0.737829														-0.19844	-0.135884
	0.738625														-0.236359	-0.128236
	0.739338														-0.126018	-0.144104
	0.73988														-0.16188	-0.0903099
	0.739942														-0.188943	0.0144496
	0.740463														-0.225443	-0.0281354
	0.740318														-0.178751	-0.162595
	0.741933														-0.144484	-0.229653
	0.743165														-0.0983252	-0.182164
	0.741822														-0.228551	-0.0761626
	0.741008														-0.228571	-0.163446
	0.73971														-0.235047	-0.111244
	0.737698														-0.13527	-0.124363
	0.737052														-0.255206	-0.140582
	0.737189														-0.219351	-0.129533
	0.738214														-0.199809	-0.227731
	0.738505														-0.232563	-0.275352
	0.737445														-0.233562	-0.295496
	0.737152														-0.172385	-0.23049
	0.737114														-0.271637	-0.188867
	0.737898														-0.222767	-0.109324
	0.737195														-0.0804606	-0.217249
	0.737418														-0.190668	-0.252712
	0.73676														0.469625	-0.337556
	0.737264														-0.0695848	-0.301807
	0.73806														-0.27797	-0.278119
	0.736157														-0.175301	-0.353666
	0.736297														-0.250623	-0.438847
	0.735489														-0.340383	-0.321469
	0.736652														-0.247116	-0.306508
	0.736419														-0.226313	-0.0785827
	0.735326														-0.244179	-0.149866
	0.735632														-0.219639	-0.253986
	0.735674														-0.272815	-0.381052
	0.734718														-0.224384	-0.333888
	0.734138														-0.134134	-0.261688
	0.734496														-0.0697242	-0.23432
	0.734503														-0.319811	-0.30239
	0.735084														-0.189	-0.285634
	0.734201														-0.230158	-0.232357
	0.734531														-0.1999	-0.170839
	0.734735														-0.250149	-0.145357
	0.734838														-0.185295	-0.258764
	0.73581														-0.248529	-0.337475
	0.734583														-0.19863	-0.32898
	0.735003														-0.293099	-0.298006
	0.734849														-0.24182	-0.211891
	0.733982														-0.298147	-0.239785
	0.73447														-0.278159	-0.313524
	0.735522														-0.305493	-0.381533
	0.734657														-0.27986	-0.331867
	0.735499														-0.371336	-0.166101
	0.73597														-0.335107	-0.156289
	0.737249														-0.366938	-0.234798
	0.737812														-0.368881	-0.347138
	0.737371														-0.346783	-0.350953
	0.739108														-0.421578	-0.226625
	0.739826														-0.429724	-0.233756
	0.74056														-0.395093	-0.269122
	0.7418														-0.395836	-0.199846
	0.741718														-0.416946	-0.306515
	0.74221														-0.486692	-0.359188
	0.743755														-0.482725	-0.324762
	0.745223														-0.421694	-0.258631
	0.745256														-0.443576	-0.180789
	0.744985														-0.448621	-0.246408
	0.743426														-0.315384	-0.161292
	0.74422														0.0979717	-0.199607
	0.745878														-0.487677	-0.330748
	0.744353														-0.583816	-0.350561
	0.743824														-0.529849	-0.351013
	0.7436														-0.565388	-0.246432
	0.743393														-0.524144	-0.260033
	0.743689														-0.567064	-0.211527
	0.741393														-0.436839	-0.395542
	0.740749														-0.45833	-0.280384
	0.740249														-0.469213	-0.208795
	0.740468														-0.535856	-0.136203
	0.739229														-0.544161	-0.195362
	0.739595														-0.542985	-0.257439
	0.741578														-0.472655	-0.322987
	0.741895														-0.549367	-0.259405
	0.740299														-0.577664	-0.251339
	0.7405														-0.567618	-0.291502
	0.740853														-0.584277	-0.459707
	0.738616														-0.61994	-0.318238
	0.739848														-0.562403	-0.192786
	0.738993														-0.562437	-0.0534219
	0.739571														-0.432063	-0.117733
	0.73918														-0.557487	-0.355455
	0.740225														-0.578418	-0.36538
	0.74014														-0.335679	-0.319672
	0.74041														-0.564815	-0.134988
	0.739781														-0.563352	-0.190222
	0.739297														-0.551655	-0.315059
	0.739576														-0.56948	-0.342854
	0.739062														-0.536685	-0.331051
	0.739121														-0.486299	-0.239751
	0.738592														-0.53462	-0.359169
	0.738683														-0.528524	-0.288522
	0.73851														-0.499941	-0.25382
	0.737243														-0.452856	-0.243059
	0.736366														-0.466455	-0.319475
	0.736297														-0.404025	-0.321912
	0.736655														-0.479308	-0.375008
	0.737866														-0.467949	-0.40733
	0.736994														-0.385135	-0.360712
	0.736184														-0.40821	-0.397279
	0.736323														-0.398451	-0.441048
	0.73708														-0.448029	-0.43141
	0.735379														-0.396259	-0.282373
	0.734975														-0.375563	-0.258448
	0.735286														-0.43131	-0.322966
	0.734542														-0.452141	-0.390382
	0.734803														-0.48865	-0.353377
	0.734487														-0.431951	-0.362435
	0.73518														-0.382188	-0.377951
	0.734007														-0.321239	-0.394379
	0.733588														-0.35401	-0.388558
	0.733145														-0.360602	-0.361995
	0.732723														-0.368035	-0.375817
	0.732112														-0.373192	-0.275189
	0.73308														-0.323595	-0.352884
	0.732454														-0.284839	-0.376524
	0.733029														-0.373671	-0.36417
	0.732022														-0.352972	-0.277355
	0.732202														-0.291545	-0.350444
	0.731976														-0.273774	-0.381402
	0.73182														-0.261496	-0.361306
	0.732412														-0.216526	-0.299767
	0.732972														-0.266399	-0.380328
	0.731934														-0.323051	-0.264748
	0.732777														-0.233604	-0.369461
	0.732813														-0.293197	-0.369501
	0.733056														-0.208303	-0.306736
	0.732628														-0.360654	-0.355654
	0.731327														-0.354216	-0.389559
	0.730751														-0.370289	-0.407702
	0.730911														-0.320624	-0.428292
	0.731926														-0.24564	-0.315573
	0.732463														-0.296199	-0.163572
	0.731738														-0.304439	-0.203986
	0.730863														-0.310771	-0.292032
	0.732296														-0.233154	-0.340909
	0.730999														-0.298607	-0.299633
	0.731488														-0.259982	-0.29785
	0.73026														-0.318106	-0.26507
	0.731165														-0.236505	-0.236255
	0.732031														-0.166918	-0.376718
	0.730501														-0.246645	-0.409194
	0.730898														-0.236147	-0.324926
	0.731246														-0.195395	-0.169725
	0.729367														-0.173598	-0.213347
	0.731048														-0.216538	-0.25771
	0.731934														-0.205476	-0.418575
	0.731675														-0.186556	-0.391846
	0.731102														-0.166482	-0.329045
	0.731404														-0.160334	-0.184408
	0.730589														-0.158039	-0.135212
	0.731292														-0.176789	-0.234896
	0.730272														-0.163289	-0.245563
	0.73079														-0.0981777	-0.250443
	0.729588														-0.136437	-0.230316
	0.7304														-0.0560473	-0.226536
	0.729627														0.457353	-0.307244
	0.730234														-0.3684	-0.31401
	0.730124														-0.371593	-0.249483
	0.729957														-0.266487	-0.187315
	0.729104														-0.250825	-0.143345
	0.729305														-0.178701	-0.247591
	0.72939														-0.154636	-0.265771
	0.72891														-0.151754	-0.239203
	0.729893														-0.111962	-0.0753583
	0.72818														-0.1142	0.0287785
	0.729434														-0.130096	-0.0991124
	0.730612														0.0474668	-0.192553
	0.729844														-0.110754	-0.271425
	0.730061														0.00135124	-0.225702
	0.731003														-0.136642	-0.0849243
	0.729892														-0.0858173	-0.16805
	0.729845														-0.0933268	-0.142765
	0.730588														-0.0962634	-0.193804
	0.73075														-0.0615963	-0.100123
	0.729941														-0.141274	-0.038161
	0.730197														-0.0523963	-0.026778
	0.729694														-0.0956622	-0.084274
	0.729634														-0.0969753	-0.139526
	0.72963														-0.0711414	-0.218028
	0.73075														-0.0167615	-0.168508
	0.730296														-0.0547766	-0.11729
	0.729432														0.0457685	-0.0278719
	0.72974														-0.0607751	-0.0243244
	0.728698														-0.0251289	-0.0597162
	0.728328														-0.0186126	-0.0574665
	0.72967														0.00784644	-0.0557735
	0.730347														0.0335235	-0.0240003
	0.729855														0.100578	-0.0453745
	0.728346														0.148783	-0.042663
	0.728755														-0.0435494	0.00310807
	0.727992														0.138288	-0.0800829
	0.728092														-0.023818	-0.124819
	0.728219														0.0457429	0.0129793
	0.727536														0.0393389	0.00920192
	0.727789														0.0882148	0.100433
	0.727516														0.139236	0.0578041
	0.727224														0.0761192	-0.0805643
	0.72739														0.120099	-0.141109
	0.727337														0.128288	-0.0963629
	0.726755														0.128742	-0.0099367
	0.727588														0.179699	-0.0129035
	0.727639														0.154266	-0.0400693
	0.727726														0.0702006	-0.0449391
	0.727186														0.0969034	0.0706579
	0.726869														0.0508299	0.10974
	0.726934														0.0770765	0.102122
	0.726598														0.0165657	0.100475
	0.726326														0.00943225	0.0212185
	0.726311														0.0464909	0.109144
	0.725172														0.0547696	0.0169203
	0.728128														0.0888149	0.0810883
	0.728444														0.0808806	0.122184
	0.72733														0.00192275	0.117038
	0.727333														0.00663344	0.05138
	0.726763														0.100939	0.105983
	0.725294														0.0855378	0.106667
	0.725616														0.101401	0.0618439
	0.726807														-0.0241629	0.0493865
	0.727412														0.12473	0.0933924
	0.727564														0.0654724	0.104915
	0.727232														0.108486	0.196068
	0.726458														0.067786	0.0616125
	0.725997														0.136779	0.0580944
	0.726535														0.0468067	0.0139825
	0.726228														0.122437	0.125787
	0.726856														0.10837	0.0275263
	0.728678														0.0629185	-0.0186229
	0.726375														0.104758	-0.0312485
	0.724921														0.318557	0.0651571
	0.726634														0.517762	0.218004
	0.727176														0.13673	0.211844
	0.726206														-0.135516	0.153863
	0.72605														0.0341749	0.112038
	0.726167														0.0500188	0.108584
	0.725172														0.0674826	0.163248
	0.724831														0.0678442	0.164623
	0.725444														0.0732624	0.221357
	0.725014														0.11697	0.087915
	0.724852														0.054059	0.0819612
	0.726761														0.0793371	0.168911
	0.726179														0.077781	0.247404
	0.72674														0.0828036	0.170061
	0.725957														0.0589367	0.0998306
	0.725765														0.0391903	0.192072
	0.725037														0.0558788	0.231477
	0.725662														0.131487	0.301935
	0.726138														0.109062	0.400692
	0.726329														0.0831346	0.294017
	0.727067														0.0631041	0.216424
	0.726882														0.146927	0.202065
	0.725329														0.108098	0.253522
	0.72547														0.0963429	0.254175
	0.72691														0.156331	0.256098
	0.726747														0.122999	0.292924
	0.726367														0.0911456	0.283329
	0.725933														0.143139	0.22547
	0.725564														0.150655	0.243595
	0.726315														0.253922	0.188848
	0.725605														0.240675	0.238207
	0.72601														0.238121	0.264747
	0.725927														0.165797	0.286793
	0.726895														0.141012	0.327552
	0.726289														0.155951	0.339793
	0.725634														0.107955	0.243397
	0.726234														0.12706	0.233315
	0.72536														0.0838295	0.224971
	0.72564														0.0664819	0.215436
	0.725194														0.156278	0.368274
	0.72586														0.162584	0.387745
	0.726207														0.264052	0.413539
	0.723902														0.547133	0.441629
	0.725023														0.116368	0.374479
	0.725739														-0.0146064	0.374933
	0.725527														0.12557	0.388343
	0.72494														0.116886	0.357916
	0.724927														0.0992594	0.531811
	0.725836														0.159074	0.421527
	0.725362														0.164084	0.290856
	0.724731														0.225117	0.313957
	0.72517														0.207624	0.340679
	0.724429														0.124636	0.385503
	0.724824														0.174292	0.408761
	0.723807														0.150838	0.35798
	0.723178														0.205054	0.401776
	0.723374														0.17356	0.411824
	0.724683														0.173809	0.457111
	0.723221														0.225903	0.479996
	0.723916														0.179967	0.363227
	0.723425														0.245823	0.362106
	0.723008														0.25077	0.421646
	0.72318														0.154098	0.379629
	0.723523														0.285776	0.387135
	0.724264														0.331918	0.2364
	0.723781														0.176183	0.297501
	0.723489														0.194096	0.40166
	0.725041														0.281037	0.450412
	0.725683														0.252523	0.421737
	0.72631														0.307725	0.443775
	0.725557														0.243878	0.500097
	0.725507														0.32609	0.430723
	0.726228														0.295838	0.339865
	0.727353														0.35821	0.253453
	0.727938														0.325816	0.303877
	0.729382														0.3157	0.298756
	0.730974														0.32281	0.43271
	0.731413														0.46157	0.449328
	0.732645														0.432161	0.378656
	0.734823														0.478005	0.332164
	0.733775														0.501712	0.295507
	0.733423														0.45851	0.354394
	0.733169														0.474839	0.359217
	0.735426														0.392202	0.463636
	0.736436														0.488345	0.552024
	0.735896														0.420458	0.56476
	0.736732														0.389442	0.442115
	0.736489														0.43559	0.401607
	0.738105														0.413001	0.417993
	0.738432														0.441361	0.420108
	0.73863														0.470224	0.493146
	0.738601														0.507016	0.474934
	0.738643
	0.737868
	0.737861
	0.735797
	0.73754
	0.735841
	0.734157
	0.733928
	0.733271
	0.731499
	0.729564
	0.731153
	0.731318
	0.730351
	0.730222
	0.730881
	0.730831
	0.730711
	0.731249
	0.73026
	0.730529
	0.730401
	0.729057
	0.728446
	0.727572
	0.726549
	0.72674
	0.726452
	0.726974
	0.727502
	0.7265
	0.727436
	0.728859
	0.730109
	0.730916
	0.73056
	0.732447
	0.734095
	0.734714
	0.734641
	0.734724
	0.734232
	0.735992
	0.734895
	0.73064
	0.730285
	0.730138
	0.730206
	0.730636
	0.730667
	0.731129
	0.73075
	0.730872
	0.72989
	0.730329
	0.730376
	0.72954
	0.728784
	0.729281
	0.728411
	0.729207
	0.728336
	0.727328
	0.726208
	0.727142
	0.726189
	0.722544
	0.722692
	0.72114
	0.721807
	0.723015
	0.72257
	0.723626
	0.723645
	0.72431
	0.724392
	0.723616
	0.723337
	0.723932
	0.723886
	0.724542
	0.724211
	0.724373
	0.72511
	0.725059
	0.724108
	0.725077
	0.724661
	0.724609
	0.723992
	0.724386
	0.724467
	0.723995
	0.724455
	0.724679
	0.724112
	0.724694
	0.723878
	0.723215
	0.723352
	0.723774
	0.724101
	0.724142
	0.723981
	0.723906
	0.724013
	0.72347
	0.724721
	0.724808
	0.725289
	0.724783
	0.724941
	0.725399
	0.725552
	0.725198
	0.724984
	0.723371
	0.724322
	0.72498
	0.723955
	0.724087
	0.724426
	0.723197
	0.722782
	0.724219
	0.724193
	0.723696
	0.723947
	0.723387
	0.723663
	0.724781
	0.723184
	0.722991
	0.723719
	0.722761
	0.722623
	0.723134
	0.722944
	0.72343
	0.723116
	0.72335
	0.724024
	0.724228
	0.724334
	0.723909
	0.723943
	0.723029
	0.723347
	0.723956
	0.723095
	0.721956
	0.722046
	0.72199
	0.721519
	0.721862
	0.72224
	0.721683
	0.721634
	0.721728
	0.721776
	0.721899
	0.721352
	0.72134
	0.721875
	0.720869
	0.721117
	0.721574
	0.722433
	0.722123
	0.721587
	0.722013
	0.722261
	0.722543
	0.721649
	0.722722
	0.721385
	0.722017
	0.721995
	0.722251
	0.72259
	0.723573
	0.722616
	0.723215
	0.722929
	0.722916
	0.722737
	0.722474
	0.722615
	0.722379
	0.723635
	0.723454
	0.722907
	0.72205
	0.725028
	0.724787
	0.724376
	0.723823
	0.723823
	0.724167
	0.723397
	0.725
	0.724879
	0.723721
	0.724661
	0.723089
	0.724178
	0.724184
	0.723659
	0.723651
	0.723445
	0.724379
	0.723788
	0.723522
	0.723941
	0.724663
	0.724662
	0.723847
	0.7235
	0.723982
	0.724055
	0.723547
	0.724683
	0.724697
	0.72424
	0.72425
	0.723769
	0.723913
	0.724412
	0.724639
	0.724757
	0.725623
	0.726032
	0.725696
	0.726084
	0.725604
	0.724887
	0.725866
	0.725488
	0.725989
	0.726455
	0.726226
	0.726088
	0.725491
	0.725817
	0.725854
	0.725806
	0.724567
	0.724023
	0.724142
	0.725076
	0.724877
	0.725064
	0.724739
	0.725811
	0.725172
	0.725382
	0.723258
	0.723171
	0.72418
	0.724436
	0.723938
	0.723276
	0.723023
	0.723273
	0.722143
	0.723945
	0.724344
	0.724547
	0.726371
	0.724816
	0.724445
	0.724349
	0.723765
	0.724973
	0.725066
	0.724887
	0.725193
	0.725641
	0.725877
	0.726608
	0.725736
	0.725206
	0.724978
	0.726742
	0.725411
	0.725038
	0.723798
	0.72423
	0.72397
	0.724676
	0.725615
	0.725534
	0.724675
	0.724963
	0.724183
	0.723747
	0.723867
	0.723579
	0.72288
	0.722773
	0.722125
	0.72118
	0.723801
	0.722673
	0.722541
	0.722877
	0.722947
	0.723953
	0.724634
	0.723458
	0.722926
	0.723921
	0.722479
	0.723326
	0.724054
	0.723664
	0.723168
	0.723458
	0.723219
	0.724138
	0.723367
	0.724559
	0.724122
	0.724497
	0.723964
	0.723325
	0.722564
	0.723244
	0.723235
	0.722238
	0.722986
	0.724167
	0.724011
	0.723515
	0.72285
	0.72303
	0.722441
	0.723126
	0.722576
	0.722594
	0.722459
	0.722594
	0.722064
	0.721215
	0.721023
	0.722888
	0.722429
	0.722017
	0.72221
	0.722164
	0.720035
	0.720259
	0.72273
	0.721561
	0.721853
	0.719963
	0.721391
	0.722221
	0.721809
	0.722165
	0.720958
	0.721199
	0.721636
	0.721629
	0.721661
	0.720837
	0.721702
	0.720519
	0.720976
	0.720133
	0.720778
	0.720619
	0.721373
	0.722515
	0.723129
	0.72511
	0.725815
	0.724536
	0.726461
	0.727425
	0.727476
	0.728408
	0.729739
	0.731787
	0.733921
	0.733808
	0.73294
	0.729797
	0.729697
	0.730593
	0.73307
	0.732666
	0.733249
	0.732796
	0.731251
	0.729892
	0.728698
	0.72988
	0.729263
	0.729241
	0.729252
	0.728195
	0.727569
	0.72672
	0.72798
	0.727098
	0.725663
	0.725951
	0.725635
	0.726026
	0.725785
	0.726286
	0.726362
	0.725738
	0.726669
	0.72491
	0.725319
	0.726701
	0.725778
	0.726265
	0.725658
	0.726612
	0.726356
	0.725327
	0.725827
	0.726179
	0.725053
	0.725466
	0.725399
	0.725344
	0.724523
	0.725689
	0.726509
	0.726555
	0.727347
	0.726525
	0.726563
	0.727123
	0.740939
	0.741157
	0.741722
	0.741364
	0.741645
	0.741709
	0.741214
	0.741445
	0.7409
	0.740797
	0.74164
	0.741085
	0.738617
	0.738425
	0.737326
	0.738813
	0.739293
	0.738433
	0.738303
	0.736509
	0.73737
	0.737373
	0.737311
	0.736573
	0.736606
	0.735866
	0.735991
	0.735444
	0.735714
	0.736241
	0.736654
	0.735854
	0.737493
	0.737505
	0.737764
	0.738216
	0.739243
	0.739332
	0.738807
	0.739413
	0.739162
	0.739696
	0.741023
	0.740906
	0.740458
	0.739442
	0.74053
	0.741867
	0.739739
	0.739151
	0.738318
	0.738983
	0.738898
	0.739541
	0.739969
	0.739635
	0.739388
	0.73937
	0.739602
	0.739676
	0.739537
	0.739846
	0.739646
	0.738496
	0.738643
	0.737811
	0.738325
	0.73842
	0.73901
	0.738543
	0.738187
	0.73825
	0.738182
	0.738167
	0.738358
	0.73875
	0.738874
	0.738111
	0.738438
	0.738348
	0.737594
	0.737698
	0.736638
	0.735825
	0.735315
	0.735807
	0.735917
	0.73631
	0.735451
	0.736575
	0.736246
	0.736188
	0.735358
	0.735026
	0.736215
	0.736492
	0.7374
	0.73808
	0.738239
	0.73789
	0.738144
	0.738043
	0.738745
	0.738032
	0.738818
	0.738552
	0.738417
	0.738241
	0.738406
	0.737844
	0.737222
	0.738128
	0.736768
	0.737645
	0.736914
	0.737128
	0.736247
	0.737451
	0.736467
	0.737787
	0.736231
	0.736537
	0.736438
	0.736596
	0.735745
	0.736579
	0.736426
	0.735806
	0.73617
	0.734891
	0.734902
	0.735297
	0.734918
	0.734753
	0.734293
	0.734499
	0.732509
	0.732813
	0.733519
	0.733368
	0.732225
	0.733207
	0.732575
	0.733814
	0.733537
	0.733627
	0.733677
	0.732413
	0.732692
	0.733415
	0.731689
	0.732334
	0.731842
	0.731854
	0.731097
	0.730653
	0.731899
	0.731416
	0.731421
	0.730326
	0.731335
	0.731546
	0.731227
	0.730331
	0.730757
	0.730871
	0.730584
	0.730512
	0.731656
	0.729555
	0.728757
	0.728647
	0.729339
	0.729096
	0.729354
	0.729617
	0.728938
	0.728651
	0.728841
	0.72821
	0.728625
	0.728636
	0.727538
	0.727745
	0.727964
	0.728983
	0.728322
	0.728178
	0.727842
	0.728496
	0.728915
	0.729218
	0.729557
	0.728957
	0.729071
	0.728637
	0.729332
	0.729006
	0.729108
	0.72917
	0.729356
	0.728831
	0.729531
	0.728759
	0.728315
	0.728646
	0.729195
	0.728453
	0.728191
	0.727905
	0.728431
	0.72875
	0.729072
	0.730136
	0.729562
	0.728755
	0.729689
	0.729131
	0.730311
	0.730575
	0.730749
	0.73201
	0.73273
	0.731988
	0.731041
	0.731216
	0.731315
	0.73109
	0.731128
	0.731448
	0.731814
	0.731305
	0.730947
	0.730468
	0.730706
	0.731129
	0.730192
	0.729884
	0.730103
	0.730233
	0.730921
	0.730052
	0.729289
	0.729128
	0.728038
	0.72966
	0.729641
	0.729204
	0.729256
	0.729296
	0.728642
	0.729929
	0.729388
	0.729051
	0.727318
	0.727508
	0.727635
	0.727075
	0.727403
	0.728036
	0.727921
	0.728158
	0.728991
	0.727782
	0.729125
	0.728951
	0.728454
	0.729275
	0.728774
	0.729702
	0.728484
	0.729303
	0.729421
	0.729027
	0.728591
	0.72738
	0.727528
	0.727462
	0.728054
	0.728423
	0.72773
	0.729199
	0.729133
	0.728052
	0.72869
	0.728908
	0.728216
	0.728456
	0.728868
	0.728356
	0.728069
	0.728763
	0.728219
	0.72752
	0.728489
	0.728524
	0.727598
	0.727631
	0.72717
	0.726124
	0.726722
	0.727203
	0.72782
	0.727401
	0.728038
	0.727333
	0.728533
	0.728451
	0.72685
	0.727296
	0.728303
	0.727053
	0.72758
	0.727355
	0.727607
	0.728104
	0.727883
	0.727677
	0.72826
	0.729124
	0.726873
	0.727822
	0.727392
	0.726995
	0.727292
	0.727619
	0.727085
	0.728435
	0.727853
	0.727413
	0.728327
	0.729252
	0.728952
	0.729482
	0.728507
	0.729352
	0.72939
	0.728486
	0.727431
	0.728048
	0.727406
	0.728046
	0.727313
	0.728013
	0.727592
	0.72786
	0.726709
	0.727011
	0.727354
	0.726897
	0.726862
	0.727421
	0.727968
	0.727199
	0.727218
	0.728071
	0.727568
	0.727076
	0.72762
	0.728115
	0.727398
	0.726711
	0.7284
	0.727973
	0.727784
	0.728376
	0.728545
	0.728472
	0.729131
	0.728967
	0.729323
	0.729209
	0.728667
	0.73026
	0.730161
	0.728755
	0.730406
	0.728537
	0.7303
	0.730186
	0.730443
	0.729628
	0.730868
	0.729755
	0.730045
	0.730236
	0.729627
	0.729771
	0.728872
	0.728593
	0.729571
	0.729187
	0.728448
	0.729078
	0.730398
	0.729303
	0.73065
	0.731293
	0.730194
	0.730324
	0.730038
	0.731989
	0.730665
	0.730132
	0.731645
	0.730878
	0.731228
	0.731865
	0.730003
	0.729412
	0.729289
	0.730955
	0.730899
	0.730877
	0.730335
	0.729775
	0.729847
	0.729408
	0.728986
	0.728498
	0.72996
	0.729261
	0.729833
	0.730561
	0.730248
	0.730753
	0.72984
	0.730957
	0.730693
	0.730616
	0.729333
	0.730945
	0.730741
	0.728573
	0.729585
	0.729019
	0.729882
	0.728529
	0.727516
	0.728848
	0.72927
	0.729986
	0.730346
	0.729749
	0.729472
	0.730006
	0.730405
	0.729882
	0.730662
	0.730514
	0.730453
	0.729574
	0.729556
	0.729973
	0.729984
	0.730279
	0.730223
	0.730692
	0.730935
	0.729923
	0.729225
	0.729712
	0.730974
	0.730676
	0.730799
	0.730075
	0.729857
	0.730524
	0.731067
	0.73067
	0.730329
	0.729869
	0.73029
	0.730062
	0.729852
	0.728275
	0.729152
	0.728862
	0.72831
	0.729122
	0.727919
	0.727925
	0.728543
	0.727079
	0.726896
	0.726885
	0.726865
	0.726407
	0.724776
	0.724727
	0.725792
	0.726224
	0.725651
	0.724784
	0.724759
	0.723962
	0.72536
	0.724343
	0.723519
	0.723721
	0.723549
	0.724288
	0.72374
	0.724124
	0.723733
	0.723327
	0.723605
	0.724309
	0.723228
	0.724751
	0.724119
	0.724141
	0.723985
	0.724132
	0.723445
	0.723152
	0.724099
	0.725157
	0.725153
	0.725119
	0.725472
	0.724109
	0.722013
	0.721901
	0.723065
	0.721995
	0.723416
	0.72351
	0.723108
	0.722548
	0.722814
	0.72351
	0.722494
	0.723401
	0.723686
	0.723209
	0.722865
	0.723328
	0.722912
	0.721538
	0.723178
	0.723749
	0.723742
	0.723785
	0.724976
	0.72404
	0.724258
	0.72457
	0.72395
	0.724484
	0.724079
	0.723855
	0.724968
	0.724561
	0.725308
	0.724305
	0.724629
	0.724753
	0.724652
	0.723576
	0.724029
	0.723516
	0.723003
	0.724003
	0.723917
	0.723455
	0.724069
	0.724237
	0.724184
	0.72322
	0.723129
	0.722686
	0.723115
	0.723271
	0.724495
	0.725467
	0.724663
	0.724073
	0.725454
	0.725408
	0.725156
	0.724631
	0.724871
	0.726299
	0.726533
	0.726415
	0.726707
	0.726586
	0.72687
	0.727101
	0.728925
	0.729711
	0.729026
	0.729782
	0.729609
	0.729784
	0.729059
	0.729289
	0.728142
	0.729126
	0.72832
	0.729266
	0.728285
	0.728911
	0.728417
	0.727684
	0.728128
	0.729568
	0.727933
	0.726498
	0.72758
	0.729735
	0.729453
	0.728606
	0.726682
	0.727568
	0.728499
	0.729078
	0.729226
	0.729157
	0.728608
	0.72939
	0.731039
	0.730849
	0.730037
	0.730328
	0.731516
	0.73096
	0.730738
	0.730274
	0.732132
	0.733044
	0.733859
	0.733445
	0.73299
	0.732333
	0.731464
	0.73122
	0.730618
	0.730515
	0.731198
	0.731354
	0.731835
	0.731282
	0.729068
	0.728486
	0.727883
	0.728616
	0.728285
	0.728498
	0.728621
	0.728274
	0.727769
	0.727821
	0.727109
	0.728229
	0.727496
	0.728349
	0.727681
	0.727044
	0.727855
	0.726821
	0.726125
	0.726617
	0.725338
	0.725563
	0.724759
	0.724595
	0.724907
	0.724902
	0.724572
	0.722987
	0.72406
	0.724003
	0.72488
	0.723346
	0.721945
	0.722565
	0.722327
	0.722364
	0.720388
	0.721135
	0.721505
	0.722259
	0.721099
	0.72134
	0.721211
	0.719635
	0.719944
	0.72024
	0.720298
	0.719865
	0.719792
	0.721264
	0.721669
	0.722292
	0.722098
	0.721845
	0.721013
	0.721268
	0.72154
	0.722142
	0.721714
	0.721743
	0.721593
	0.720291
	0.720297
	0.720701
	0.720571
	0.720433
	0.721512
	0.720379
	0.720608
	0.720394
	0.720575
	0.719645
	0.719826
	0.719765
	0.721019
	0.720917
	0.720952
	0.72087
	0.718568
	0.720302
	0.719776
	0.719822
	0.720252
	0.720128
	0.720872
	0.721267
	0.722283
	0.722508
	0.722043
	0.72239
	0.723422
	0.722906
	0.722387
	0.722432
	0.724199
	0.723988
	0.72452
	0.724004
	0.724905
	0.726668
	0.726331
	0.726447
	0.726022
	0.726252
	0.727287
	0.72727
	0.728005
	0.726562
	0.727563
	0.728561
	0.727631
	0.72677
	0.727162
	0.728985
	0.728146
	0.727087
	0.72842
	0.726687
	0.725742
	0.725752
	0.724196
	0.724375
	0.723976
	0.724412
	0.726486
	0.725436
	0.725337
	0.725247
	0.726413
	0.726103
	0.726659
	0.725264
	0.724954
	0.725233
	0.725457
	0.725894
	0.725846
	0.725597
	0.724741
	0.725064
	0.725638
	0.725047
	0.725387
	0.725167
	0.725741
	0.725913
	0.725129
	0.725348
	0.725411
	0.724398
	0.72506
	0.724591
	0.724593
	0.724361
	0.724818
	0.724143
	0.724189
	0.723637
	0.722716
	0.723476
	0.72393
	0.72325
	0.722121
	0.724344
	0.724161
	0.723272
	0.722167
	0.723898
	0.723175
	0.723573
	0.72279
	0.723708
	0.723244
	0.72194
	0.722595
	0.722987
	0.723551
	0.72392
	0.721485
	0.722611
	0.72307
	0.72343
	0.72087
	0.722023
	0.722266
	0.722353
	0.72315
	0.722122
	0.721499
	0.721757
	0.722226
	0.722296
	0.722216
	0.721706
	0.722245
	0.721973
	0.722819
	0.720967
	0.721145
	0.721158
	0.72107
	0.721622
	0.721234
	0.719304
	0.720432
	0.720352
	0.721111
	0.720907
	0.720283
	0.721329
	0.720314
	0.720506
	0.720115
	0.719854
	0.721151
	0.721273
	0.721813
	0.721551
	0.719656
	0.720133
	0.721263
	0.720421
	0.714355
	0.718028
	0.719005
	0.720649
	0.71998
	0.721304
	0.720716
	0.720331
	0.720119
	0.720065
	0.721233
	0.72074
	0.720728
	0.720791
	0.720695
	0.720312
	0.721076
	0.72097
	0.721245
	0.720321
	0.72227
	0.720682
	0.71919
	0.720221
	0.720877
	0.720785
	0.71981
	0.719573
	0.718997
	0.718055
	0.71818
	0.718701
	0.718479
	0.718738
	0.719358
	0.719319
	0.717929
	0.718273
	0.717777
	0.719095
	0.718153
	0.717894
	0.720012
	0.718787
	0.718693
	0.718939
	0.719326
	0.72024
	0.720552
	0.720814
	0.72066
	0.718559
	0.719049
	0.719665
	0.719585
	0.719105
	0.718079
	0.71903
	0.719352
	0.719949
	0.719164
	0.717526
	0.719278
	0.718525
	0.718646
	0.718227
	0.718845
	0.718653
	0.718422
	0.718949
	0.718957
	0.719339
	0.718523
	0.718903
	0.71969
	0.719552
	0.734163
	0.73358
	0.733289
	0.733947
	0.733696
	0.734397
	0.734265
	0.734664
	0.734915
	0.7359
	0.735118
	0.736243
	0.737161
	0.736774
	0.735349
	0.735457
	0.735714
	0.735211
	0.735166
	0.735304
	0.734104
	0.734316
	0.734321
	0.733912
	0.735088
	0.734741
	0.734162
	0.73325
	0.732523
	0.732325
	0.733014
	0.73354
	0.731936
	0.732734
	0.730596
	0.731613
	0.732473
	0.731178
	0.731091
	0.731719
	0.731445
	0.731326
	0.731522
	0.731255
	0.731275
	0.73059
	0.729738
	0.729314
	0.729585
	0.729073
	0.72994
	0.729593
	0.727456
	0.727877
	0.729611
	0.728573
	0.729268
	0.727164
	0.726931
	0.728433
	0.728586
	0.727498
	0.726635
	0.727241
	0.727831
	0.726704
	0.727001
	0.726784
	0.726594
	0.726331
	0.726478
	0.725648
	0.72594
	0.725699
	0.724974
	0.723376
	0.725015
	0.726054
	0.72415
	0.724824
	0.72565
	0.724351
	0.725113
	0.724213
	0.725319
	0.723521
	0.723538
	0.723221
	0.722412
	0.723382
	0.722762
	0.722858
	0.722539
	0.721524
	0.722021
	0.720915
	0.720481
	0.721129
	0.720715
	0.721167
	0.72301
	0.72176
	0.720959
	0.72089
	0.720411
	0.720044
	0.719671
	0.71893
	0.719387
	0.71875
	0.720234
	0.718802
	0.719125
	0.719472
	0.719791
	0.720518
	0.718796
[truncated: 22,009 more rows]
