# Supplementary material for: Cold induces brain region-selective cell activity-dependent lipid metabolism
Source: eLife. 2025 Jan 30;13:RP98353. doi: 10.7554/eLife.98353 (PMC11781799; doi:10.7554/eLife.98353)
Supplement: Figure 7—source data 1. [file elife-98353-fig7-data1.xlsx]

## Sheet: Figure 7-source data 1
	Figure-7A
	Green	Red				Figure-7B										Figure 7C								Figure 7D
	1.01658	0.997326				Time (min)	Animal 1	Animal 2	Animal 3	Animal 4	Animal 5	Animal 6				Time (min)	Animal 1	Animal 2	Animal 3	Animal 4				Time (min)	Animal 1	Animal 2	Animal 3	Animal 4
	1.01601	0.997187				0	0.998861	0.99773	1.01334	1.00533	0.966718	0.990644				0	0.985626	0.98707	1.00461	1.00427				0	1.0058	1.00275	0.996791	0.998804
	1.01524	0.995561					1.00114	1.00053	1.00079	0.999829	0.997688	0.999397					1.0035	1.00163	1.00076	1.00033					1.00073	1.00054	1.00105	1.0004
	1.0139	0.992973					1.01548	1.00174	0.98587	0.994838	1.03559	1.00996					1.01088	1.0113	0.994625	0.995401					0.993472	0.996717	1.00216	1.0008
	1.01414	0.994466					1.02906	1.00389	0.980867	0.993186	1.0722	1.01875					0.99597	1.02696	1.0045	0.994944					0.987125	0.993938	1.00674	1.00215
	1.01389	0.99401					1.03983	1.01359	1.0128	1.02476	1.1077	1.04897					0.995819	1.02919	1.01654	0.998507					0.963624	0.991319	1.00606	1.00239
	1.01353	0.991837				30	1.0419	1.02607	1.06049	1.06207	1.13466	1.07411				30	0.995962	1.04269	1.02399	1.00084				30	0.944272	0.96924	1.00399	1.00571
	1.01315	0.988616					1.04451	1.04891	1.10547	1.10525	1.18003	1.09622					0.999108	1.04584	1.02388	1.00415					0.932055	0.963519	1.00859	1.00529
	1.01311	0.991266					1.04854	1.0491	1.15204	1.1351	1.21276	1.12564					1.00831	1.04612	1.01315	0.989285					0.920526	0.9449	1.0045	1.00739
	1.01198	0.990112					1.04524	1.04908	1.16055	1.13846	1.23173	1.1354					1.00765	1.05668	0.990619	0.978613					0.906882	0.94918	1.00824	1.01015
	1.01193	0.991212					1.04949	1.05352	1.1269	1.12941	1.24386	1.13327					1.00858	1.07485	0.993695	0.978152					0.887847	0.946543	1.01222	1.01284
	1.01195	0.991586					1.04452	1.04536	1.12032	1.10491	1.2675	1.15839					0.999471	1.07032	0.994018	0.983085					0.885963	0.951634	1.01663	1.0123
	1.01081	0.991065				60	1.04814	1.05951	1.15486	1.15123	1.303	1.17214				60	1.01615	1.07256	0.975572	0.976634				60	0.87752	0.946019	1.02241	1.01565
	1.0123	0.99216					1.047	1.05222	1.13191	1.11401	1.29952	1.16396					1.01739	1.08608	0.964012	0.962179					0.868044	0.952478	1.02924	1.01505
	1.01078	0.989275					1.04313	1.05075	1.09647	1.07855	1.31886	1.15222					1.01839	1.097	0.970794	0.965157					0.864319	0.939014	1.04001	1.01937
	1.01189	0.992499					1.04992	1.05442	1.08503	1.07519	1.34296	1.1635					1.00883	1.11179	0.977719	0.975919					0.867842	0.947899	1.02801	1.02577
	1.01153	0.991755					1.03834	1.05218	1.13321	1.10863	1.37852	1.18153					1.00621	1.12067	0.961445	0.971944					0.866846	0.943596	1.04246	1.0293
	1.01113	0.990162					1.0346	1.05687	1.09962	1.16487	1.3843	1.1851					1.00639	1.13505	0.947906	0.962465					0.852352	0.933167	1.04937	1.03014
	1.01287	0.98851				90	1.03722	1.05237	1.0648	1.1083	1.38033	1.17492				90	1.0098	1.13783	0.950016	0.95344				90	0.84471	0.933549	1.05171	1.0271
	1.01245	0.98698					1.04077	1.05798	1.05284	1.13086	1.40715	1.19804					1.00827	1.16134	0.959413	0.96407					0.848495	0.937225	1.05942	1.03206
	1.01197	0.987785
	1.01167	0.988565
	1.01196	0.985221
	1.01096	0.989311
	1.01067	0.987375
	1.01028	0.990953
	1.01005	0.991247
	1.01109	0.987894
	1.01009	0.98818
	1.01067	0.988229
	1.0099	0.989384
	1.01115	0.990707
	1.01019	0.987089
	1.01059	0.989562
	1.00999	0.988424
	1.009	0.987902
	1.0101	0.987631
	1.01044	0.990068
	1.00935	0.988941
	1.01015	0.989971
	1.00885	0.990727
	1.00969	0.989518
	1.00947	0.991214
	1.00965	0.990843
	1.01059	0.989518
	1.00829	0.989842
	1.00929	0.987707
	1.00986	0.988871
	1.00862	0.987789
	1.00958	0.990081
	1.00993	0.98822
	1.00851	0.988013
	1.00878	0.98767
	1.00876	0.987649
	1.00934	0.990567
	1.00896	0.989355
	1.00915	0.989946
	1.00925	0.990418
	1.00923	0.989847
	1.00873	0.987982
	1.0094	0.987667
	1.00861	0.988297
	1.00879	0.988864
	1.00948	0.988052
	1.00915	0.9893
	1.00777	0.989094
	1.00818	0.986224
	1.0086	0.987864
	1.00832	0.98785
	1.00837	0.988535
	1.0094	0.988828
	1.00793	0.988721
	1.00785	0.990297
	1.00805	0.989043
	1.00806	0.989144
	1.00816	0.990411
	1.00829	0.987835
	1.00827	0.988847
	1.00819	0.989502
	1.00921	0.988374
	1.00855	0.988642
	1.0077	0.98955
	1.0078	0.98844
	1.00716	0.988985
	1.00802	0.988774
	1.00783	0.988922
	1.00812	0.991292
	1.0077	0.989515
	1.00755	0.988872
	1.00821	0.987641
	1.00819	0.988471
	1.00862	0.988624
	1.00765	0.987958
	1.00721	0.98758
	1.00724	0.986046
	1.00731	0.989461
	1.00735	0.988509
	1.0062	0.988915
	1.00686	0.986996
	1.00831	0.988043
	1.00721	0.989617
	1.00696	0.987873
	1.00778	0.990725
	1.0083	0.991553
	1.00825	0.989737
	1.00726	0.989406
	1.0078	0.988508
	1.0069	0.984274
	1.00632	0.987138
	1.00721	0.984169
	1.00694	0.988608
	1.00681	0.987476
	1.00712	0.990277
	1.00738	0.986952
	1.00726	0.987907
	1.00655	0.98874
	1.00696	0.988216
	1.00721	0.991249
	1.00706	0.990667
	1.00643	0.990383
	1.00717	0.988958
	1.00679	0.989149
	1.00691	0.990641
	1.00735	0.98802
	1.00633	0.990371
	1.00589	0.989725
	1.00706	0.988902
	1.0065	0.990167
	1.00625	0.989917
	1.00639	0.989244
	1.00703	0.986993
	1.00677	0.988961
	1.00676	0.989707
	1.00686	0.988831
	1.00808	0.989345
	1.00834	0.988027
	1.00713	0.988105
	1.0062	0.985824
	1.00636	0.987767
	1.00712	0.990998
	1.0068	0.98801
	1.00661	0.988753
	1.00711	0.989198
	1.00686	0.988582
	1.00601	0.987961
	1.00577	0.991038
	1.00602	0.990358
	1.00604	0.989926
	1.0062	0.986657
	1.00617	0.988993
	1.00644	0.988316
	1.00746	0.988029
	1.00652	0.98809
	1.00611	0.986378
	1.00593	0.988371
	1.00617	0.989907
	1.00566	0.99044
	1.00544	0.989669
	1.00564	0.99037
	1.00578	0.990925
	1.00565	0.988701
	1.0064	0.989886
	1.00567	0.989608
	1.00501	0.988464
	1.00492	0.991019
	1.00533	0.98797
	1.00544	0.990286
	1.0053	0.989252
	1.00665	0.988508
	1.00622	0.986083
	1.00554	0.987017
	1.00576	0.987732
	1.00623	0.991614
	1.00628	0.988441
	1.00608	0.990255
	1.00596	0.992006
	1.00623	0.991404
	1.00445	0.989665
	1.00535	0.990451
	1.00454	0.989038
	1.00517	0.989235
	1.00518	0.986535
	1.00607	0.988615
	1.00605	0.986991
	1.00513	0.98824
	1.00432	0.987499
	1.00542	0.988555
	1.00517	0.989104
	1.00485	0.9887
	1.00537	0.990184
	1.00493	0.992012
	1.00506	0.991268
	1.00535	0.991
	1.00439	0.989838
	1.00574	0.989807
	1.00572	0.989701
	1.00517	0.990269
	1.00496	0.989205
	1.00543	0.989211
	1.0058	0.986868
	1.00535	0.989928
	1.00484	0.990558
	1.00506	0.990071
	1.00547	0.990519
	1.00632	0.991071
	1.00508	0.991689
	1.00495	0.99191
	1.0055	0.994023
	1.00573	0.990386
	1.00527	0.990432
	1.00559	0.989661
	1.00556	0.991241
	1.0055	0.989984
	1.00544	0.99073
	1.00558	0.988547
	1.00502	0.99007
	1.00495	0.990857
	1.00553	0.990817
	1.00657	0.993325
	1.00551	0.990911
	1.00607	0.992776
	1.00646	0.990362
	1.00568	0.990494
	1.00544	0.989643
	1.00545	0.987444
	1.00518	0.987244
	1.00518	0.987329
	1.00502	0.990799
	1.00466	0.989017
	1.00369	0.991877
	1.00429	0.989011
	1.00576	0.986919
	1.00396	0.99052
	1.00412	0.98791
	1.00546	0.991985
	1.0063	0.991418
	1.00555	0.99179
	1.00496	0.99073
	1.00492	0.989118
	1.00411	0.989102
	1.00489	0.989149
	1.00568	0.988627
	1.00525	0.989913
	1.0051	0.991296
	1.00614	0.991351
	1.00538	0.992137
	1.0056	0.989827
	1.00537	0.989908
	1.00535	0.990054
	1.00451	0.990539
	1.0052	0.992186
	1.00499	0.989717
	1.00392	0.990651
	1.00333	0.987821
	1.00363	0.990812
	1.00482	0.988191
	1.00486	0.991377
	1.00483	0.990636
	1.00487	0.988023
	1.00508	0.990717
	1.00563	0.991604
	1.00491	0.991543
	1.00421	0.990609
	1.00384	0.992391
	1.00435	0.990936
	1.00461	0.990348
	1.00416	0.988613
	1.00346	0.988914
	1.0047	0.990097
	1.00517	0.986955
	1.00518	0.989096
	1.00487	0.98893
	1.00489	0.989218
	1.00452	0.988127
	1.00402	0.987478
	1.00439	0.988253
	1.00471	0.990918
	1.00484	0.992688
	1.00416	0.99046
	1.00528	0.991185
	1.00433	0.989323
	1.00378	0.992977
	1.00498	0.990898
	1.00452	0.98963
	1.00337	0.988802
	1.00413	0.988149
	1.00351	0.990617
	1.00352	0.990206
	1.0046	0.990827
	1.00445	0.989907
	1.00423	0.989588
	1.00373	0.988589
	1.00381	0.990883
	1.00378	0.989553
	1.00343	0.990319
	1.00394	0.990845
	1.00452	0.992418
	1.00398	0.993715
	1.00312	0.99225
	1.00367	0.991778
	1.00392	0.988043
	1.00406	0.991317
	1.00411	0.991842
	1.00421	0.992385
	1.00398	0.987923
	1.00457	0.9895
	1.00319	0.991854
	1.00384	0.992458
	1.00424	0.988389
	1.00426	0.990411
	1.00327	0.991916
	1.00478	0.994726
	1.00416	0.992517
	1.00416	0.991688
	1.00411	0.98937
	1.00434	0.991045
	1.00366	0.991371
	1.00472	0.991205
	1.00485	0.992642
	1.00349	0.991454
	1.00328	0.992149
	1.00295	0.990987
	1.00391	0.99042
	1.00313	0.992114
	1.00338	0.992377
	1.0042	0.992594
	1.00375	0.994314
	1.00324	0.99322
	1.00274	0.994087
	1.00257	0.989616
	1.00259	0.992871
	1.00349	0.991486
	1.00362	0.98964
	1.00351	0.992668
	1.00274	0.990213
	1.00266	0.99422
	1.00329	0.99347
	1.00229	0.993931
	1.00283	0.994666
	1.00319	0.994958
	1.00338	0.994063
	1.00408	0.993483
	1.00351	0.99249
	1.00244	0.990744
	1.00451	0.991106
	1.0046	0.99109
	1.00348	0.990116
	1.00288	0.993219
	1.00357	0.991985
	1.00442	0.992125
	1.00367	0.990358
	1.00309	0.993164
	1.00299	0.993595
	1.00251	0.993102
	1.00266	0.992662
	1.00363	0.99505
	1.0037	0.993256
	1.0032	0.991753
	1.00367	0.989771
	1.00163	0.991147
	1.00249	0.991153
	1.00313	0.994204
	1.00287	0.990438
	1.00228	0.990744
	1.00293	0.990377
	1.00325	0.993759
	1.00356	0.994849
	1.00281	0.994559
	1.00295	0.995893
	1.00288	0.993734
	1.00354	0.994907
	1.00237	0.994287
	1.00312	0.99422
	1.00304	0.992651
	1.00431	0.991138
	1.00336	0.992502
	1.00278	0.992341
	1.00322	0.991025
	1.00317	0.990084
	1.00301	0.991674
	1.0039	0.993017
	1.00358	0.993679
	1.00263	0.992401
	1.00326	0.993814
	1.0016	0.992161
	1.00163	0.994654
	1.00256	0.993061
	1.00368	0.991656
	1.00324	0.992578
	1.00204	0.990152
	1.0017	0.992259
	1.00175	0.9887
	1.00289	0.992465
	1.00269	0.993432
	1.00353	0.992186
	1.00161	0.992514
	1.00188	0.99388
	1.00309	0.996498
	1.00243	0.994947
	1.00233	0.99564
	1.00258	0.994466
	1.00223	0.994369
	1.00138	0.992476
	1.00252	0.993783
	1.00351	0.994075
	1.00243	0.993121
	1.00191	0.994288
	1.00191	0.99165
	1.00219	0.99207
	1.00194	0.99324
	1.00192	0.994764
	1.00337	0.995438
	1.00306	0.994275
	1.00426	0.994607
	1.0024	0.996077
	1.00254	0.993525
	1.00438	0.992659
	1.00359	0.993497
	1.00281	0.995043
	1.00293	0.994932
	1.00296	0.992674
	1.00321	0.99253
	1.00302	0.990384
	1.00272	0.992044
	1.00192	0.993723
	1.00239	0.993996
	1.00211	0.993445
	1.00313	0.993552
	1.00317	0.993099
	1.00261	0.993649
	1.0016	0.994494
	1.00251	0.993882
	1.00309	0.993442
	1.00278	0.993603
	1.00188	0.993567
	1.00161	0.993666
	1.00148	0.99184
	1.00074	0.995999
	1.00108	0.994262
	1.00122	0.996718
	1.0011	0.994071
	1.00229	0.99434
	1.00273	0.995139
	1.00297	0.995559
	1.00291	0.993715
	1.00272	0.992537
	1.00217	0.996202
	1.0011	0.991902
	1.00132	0.996214
	1.00184	0.995684
	1.00238	0.995535
	1.00282	0.993234
	1.00207	0.99349
	1.00286	0.996202
	1.00299	0.995431
	1.0024	0.995917
	1.00285	0.994178
	1.00233	0.996354
	1.00254	0.993251
	1.0027	0.994394
	1.00343	0.993383
	1.00303	0.994404
	1.0032	0.991291
	1.00338	0.994282
	1.00427	0.992513
	1.00382	0.993806
	1.00398	0.991033
	1.00205	0.992506
	1.00243	0.99213
	1.00163	0.99394
	1.002	0.996168
	1.00317	0.991832
	1.00228	0.995316
	1.00249	0.994715
	1.00139	0.997009
	1.00166	0.997648
	1.00194	0.994733
	1.00284	0.995504
	1.0024	0.991231
	1.0009	0.994239
	1.00187	0.99105
	1.00177	0.994206
	1.00167	0.99191
	1.00122	0.995093
	1.00095	0.993444
	1.00095	0.993946
	1.00093	0.996113
	1.00137	0.99384
	1.00211	0.997931
	1.00145	0.996231
	1.00091	0.996493
	1.00075	0.99423
	1.00105	0.994495
	1.00204	0.994251
	1.00299	0.992596
	1.00142	0.994652
	1.00226	0.991046
	1.00098	0.991518
	1.00203	0.995346
	1.00203	0.99408
	1.00092	0.996619
	1.00154	0.997594
	1.0017	0.998877
	1.00206	0.996105
	1.00133	0.99764
	1.00158	0.996468
	1.00177	0.995821
	1.00133	0.992769
	1.00265	0.993055
	1.00177	0.992973
	1.00169	0.992368
	1.00146	0.995472
	1.00126	0.99132
	1.00158	0.994723
	1.00225	0.994369
	1.00126	0.994825
	1.00225	0.993957
	1.00226	0.995775
	1.00163	0.993198
	1.00148	0.995032
	1.00183	0.992602
	1.00133	0.992547
	1.00176	0.993772
	1.00102	0.993757
	1.00056	0.992724
	1.00087	0.993885
	1.002	0.99459
	1.00264	0.993954
	1.00213	0.995625
	1.00164	0.993134
	1.00134	0.997241
	1.00086	0.99327
	1.0016	0.994316
	1.00054	0.994166
	1.00136	0.995839
	1.00227	0.996276
	1.00102	0.996039
	1.00048	0.995125
	1.00136	0.996317
	1.00124	0.995226
	1.00089	0.993066
	1.00259	0.993547
	1.0029	0.995232
	1.00216	0.996222
	1.00202	0.994309
	1.00277	0.994586
	1.00234	0.996448
	1.00149	0.992962
	1.00104	0.994755
	1.00251	0.995416
	1.00182	0.993241
	1.00322	0.994132
	1.00174	0.996207
	1.0025	0.993825
	1.00137	0.994567
	1.00132	0.992345
	1.00205	0.9921
	1.00304	0.990793
	1.00206	0.993428
	1.00158	0.993787
	1.00239	0.996348
	1.00202	0.993927
	1.00185	0.994605
	1.00081	0.993817
	1.00159	0.996826
	1.00167	0.9964
	1.00068	0.996171
	1.00114	0.992415
	1.00056	0.992255
	1.00087	0.993743
	1.00143	0.994621
	1.00127	0.995268
	1.00126	0.996008
	1.00105	0.992309
	1.00246	0.995323
	1.00206	0.994695
	1.0022	0.996283
	1.00281	0.994156
	1.00184	0.994772
	1.00259	0.994405
	1.00274	0.996817
	1.00221	0.996566
	1.00126	0.995235
	1.00274	0.99319
	1.00204	0.994523
	1.00214	0.994354
	1.00319	0.994897
	1.00263	0.994506
	1.00243	0.99617
	1.00242	0.994044
	1.00152	0.99303
	1.00257	0.996611
	1.00267	0.996459
	1.00292	0.998384
	1.00227	0.995937
	1.00295	0.995006
	1.00212	0.99401
	1.00164	0.997063
	1.00152	0.99604
	1.00157	0.994157
	1.00066	0.99414
	1.00127	0.993839
	1.0022	0.995414
	1.00141	0.994817
	1.00197	0.991351
	1.00282	0.992315
	1.00247	0.991578
	1.0017	0.994039
	1.00079	0.99342
	1.00057	0.995804
	1.00108	0.993281
	1.00086	0.995597
	1.0001	0.994068
	0.999688	0.992984
	1.00103	0.995288
	1.0005	0.996594
	1.00077	0.995637
	1.00123	0.994967
	1.00145	0.994471
	1.00112	0.994869
	1.00153	0.996801
	1.00221	0.996156
	1.00067	0.998623
	1.00059	0.998826
	1.00127	0.998806
	1.0017	0.998295
	1.00049	0.997341
	1.00093	0.99791
	1.00122	0.993723
	1.00155	0.994965
	1.00138	0.99438
	1.00146	0.994747
	1.00123	0.996435
	1.00133	0.996231
	1.00091	0.997076
	1.00064	0.997675
	1.00175	0.996491
	1.0015	0.998781
	1.00044	0.998559
	1.00095	0.998228
	1.00122	0.996918
	1.00099	0.995429
	1.00008	0.995078
	0.999658	0.996491
	1.00019	0.997539
	1.00038	0.994613
	1.00078	0.996608
	1.00055	0.996568
	1.00015	0.998556
	1.00003	0.998445
	1.00148	0.998032
	1.00176	0.999089
	1.00097	0.998051
	1.00101	0.996619
	1.00032	0.998287
	1.00053	0.999561
	1.0012	0.998993
	1.00102	0.998007
	0.99932	0.999519
	0.9999	0.99654
	1.00001	0.996247
	1.00029	0.997039
	1.00046	0.994958
	1.00082	0.996261
	1.00026	0.995849
	1.00122	0.998375
	1.00124	0.995992
	1.00125	0.998417
	1.00099	0.99766
	1.00101	0.998148
	1.00104	0.998601
	1.0009	0.995977
	1.0025	0.996253
	1.00163	0.996148
	1.00174	0.994705
	1.00124	0.99398
	1.00054	0.994485
	1.00077	0.996688
	1.00102	0.99671
	1.00125	0.998801
	1.00137	0.996376
	1.0012	0.998271
	1.00079	0.997645
	1.00063	1.00027
	1.00089	0.999389
	1.00162	0.999048
	1.00059	0.998998
	0.999585	0.996899
	1.00034	0.995002
	1.00108	0.999581
	0.999847	0.997238
	1.00048	0.99944
	0.999544	0.996257
	1.0004	0.998885
	1.00177	0.997913
	1.00194	0.998114
	1.00086	0.997485
	1.00139	0.999124
	1.00136	1.00032
	1.00102	0.998262
	0.999983	1.00059
	1.00007	0.996868
	0.999764	0.996948
	1.00049	0.99781
	1.00045	0.99717
	1.00135	0.996625
	1.00143	0.998503
	1.00008	0.997092
	0.999226	0.999281
	0.999206	0.998088
	0.999464	0.999186
	0.999969	0.999822
	1.00051	0.995506
	1.00054	0.998624
	0.999613	0.996328
	1.00058	0.996946
	1.00036	0.99529
	1	0.997344
	0.999675	0.995293
	0.999627	0.996109
	0.999441	0.998129
	1.00041	0.999131
	1.00098	0.997334
	1.00036	1.0012
	0.999211	0.998677
	0.999881	0.999286
	0.999797	0.999791
	1.00065	0.998796
	1.00046	0.999559
	0.999922	0.99694
	1.00001	0.997145
	0.999492	0.996417
	0.998599	0.998017
	1.00055	0.996288
	0.999356	0.996519
	1.0004	0.999014
	1.00015	0.998494
	0.999616	0.999375
	0.999725	0.999053
	0.999765	1.00176
	0.999539	1.00128
	0.999686	0.998027
	0.999553	0.998608
	1.00013	0.998188
	1.0011	0.998651
	0.998779	0.997676
	0.999804	0.998157
	0.999494	0.998272
	0.999303	0.997371
	1.00001	0.998462
	0.999867	0.997703
	0.999514	0.997219
	0.999898	0.998573
	0.999575	0.997645
	0.999114	0.999708
	1.00011	0.998486
	1.00051	0.999201
	1.00015	0.999839
	0.999879	0.998551
	0.999297	0.998962
	0.999228	0.997837
	0.998556	0.99874
	0.99893	0.998363
	0.999738	0.999703
	0.999759	0.997308
	0.998969	0.998071
	0.998412	0.997157
	0.998606	0.998038
	0.998094	1.00017
	0.998792	0.998416
	0.999414	1.0006
	0.999297	1.00025
	0.999975	1.00004
	0.9997	0.996813
	1.0001	0.996505
	0.999317	0.997836
	0.998944	0.995596
	0.999889	0.998834
	0.998601	0.996573
	0.99961	0.998167
	0.998654	0.998468
	0.998331	0.99598
	0.998142	0.99952
	0.999589	0.997115
	0.999354	0.999371
	0.998883	0.999648
	0.998625	1.00037
	0.9996	1.00251
	0.999434	0.997251
	0.998525	1.00105
	0.999729	0.997326
	0.998898	0.997956
	0.999727	0.999574
	0.999428	0.997229
	0.998811	0.999861
	0.998429	0.997525
	0.998657	0.998726
	0.999029	0.998468
	0.999042	0.996778
	0.99971	1.0008
	0.999527	0.998071
	0.997552	1.00116
	0.997292	1.00067
	0.999231	1.0012
	0.999736	0.997404
	0.999084	0.998234
	0.998169	0.998574
	0.999898	0.999515
	0.999007	1.0005
	0.998633	0.998384
	0.998452	0.999252
	0.999346	0.997747
	0.998771	1.00001
	0.999615	0.998384
	0.999623	0.998669
	0.997761	1.00088
	0.998732	1.00046
	0.999646	0.998555
	1.00031	0.997841
	0.999361	0.997085
	0.999858	0.9976
	0.998923	0.998539
	0.998588	0.998537
	0.999451	1.00004
	0.999174	0.999061
	0.998882	0.998255
	0.999717	0.998713
	0.999474	0.999965
	1.00028	1.00137
	1.00014	1.00142
	0.999374	1.00061
	0.999776	0.997869
	0.998961	0.998948
	0.998641	0.999006
	0.999464	0.997489
	0.997942	0.998963
	0.998686	0.999761
	0.999476	0.998023
	0.999368	1.00073
	0.999337	1.00296
	0.999366	0.998962
	0.998597	0.999626
	0.99917	1.00032
	0.999844	0.999312
	0.998466	0.999022
	0.998515	1.00036
	0.99929	0.99822
	1.00011	0.997522
	0.999812	0.997413
	0.999439	0.997716
	0.999211	0.997802
	0.999154	0.998738
	0.997891	0.999129
	0.997945	0.998536
	0.997204	0.999017
	0.998153	0.998726
	0.998874	1.00021
	0.998419	0.997404
	0.998408	1.0013
	0.999614	0.998334
	0.998274	0.999717
	0.998053	0.999621
	0.999058	0.999672
	0.998824	0.998551
	0.998217	0.998966
	0.998298	0.998227
	0.997788	0.999026
	0.998729	0.997105
	0.9987	0.998612
	0.998045	0.999054
	0.998914	0.999313
	0.998764	1.00097
	0.998408	0.999822
	0.998508	0.998649
	0.998655	0.9978
	0.997713	0.998757
	0.998581	0.997689
	0.999124	0.996481
	0.99877	0.997119
	0.998658	0.997003
	0.99818	0.99957
	0.998508	0.997602
	0.997555	0.999381
	0.997732	1.00033
	0.997641	0.998339
	0.99947	0.999976
	0.998755	0.997645
	0.998431	0.999094
	0.997649	0.999578
	0.997871	0.99969
	0.998201	0.998524
	0.999014	0.998412
	0.999635	0.996442
	0.999522	0.997147
	0.999602	0.997917
	0.999237	0.99799
	0.999579	0.996815
	0.997765	0.998463
	0.999683	0.997556
	0.999518	1.00007
	1.00012	0.997611
	0.999677	0.997629
	0.998729	0.995486
	1.00048	0.998191
	0.998991	1.00156
	0.998889	0.99869
	0.998634	1.00008
	0.99898	0.998077
	1.00004	0.999696
	0.998884	1.00043
	0.998422	1.00081
	0.998429	1.00005
	0.998704	1.00028
	0.997251	1.00025
	0.998713	0.998704
	0.999997	0.998255
	0.999534	0.996786
	1.02058	0.993061
	1.01932	0.991093
	1.01797	0.990084
	1.01651	0.985788
	1.01625	0.985802
	1.01663	0.983569
	1.0163	0.982883
	1.0153	0.98428
	1.01535	0.97959
	1.01476	0.981606
	1.01433	0.979911
	1.01399	0.983992
	1.01341	0.982836
	1.01467	0.982111
	1.01377	0.980924
	1.0135	0.979106
	1.01507	0.978402
	1.01415	0.978438
	1.01327	0.977946
	1.01251	0.979533
	1.0129	0.978764
	1.01312	0.977757
	1.01384	0.980248
	1.01232	0.979189
	1.01398	0.979954
	1.01285	0.979095
	1.01202	0.981432
	1.01258	0.978928
	1.01268	0.982758
	1.01316	0.980734
	1.01309	0.97908
	1.01306	0.979361
	1.01154	0.977707
	1.01187	0.977828
	1.01108	0.975754
	1.01186	0.976618
	1.01243	0.978735
	1.01118	0.978949
	1.01098	0.975503
	1.01093	0.978487
	1.01192	0.979346
	1.01227	0.979176
	1.0116	0.977553
	1.01151	0.980753
	1.01186	0.978939
	1.01226	0.978349
	1.01171	0.976143
	1.01101	0.97755
	1.01088	0.97649
	1.01109	0.97512
	1.01044	0.97602
	1.01072	0.97516
	1.01156	0.975775
	1.01181	0.977288
	1.01123	0.978946
	1.01063	0.977983
	1.01111	0.977538
	1.01135	0.980025
	1.01102	0.979864
	1.01129	0.979885
	1.01115	0.978841
	1.01153	0.976785
	1.01098	0.978667
	1.01103	0.978319
	1.01071	0.979902
	1.01065	0.975882
	1.00977	0.977105
	1.00996	0.976807
	1.01068	0.976206
	1.01058	0.976649
	1.01	0.976389
	1.00955	0.978715
	1.01016	0.979519
	1.01088	0.980694
	1.01082	0.979246
	1.01087	0.980602
	1.01079	0.979616
	1.01033	0.977301
	1.01114	0.97866
	1.01023	0.978493
	1.00978	0.977547
	1.01057	0.979312
	1.00954	0.977771
	1.01028	0.97866
	1.01069	0.977118
	1.0117	0.979929
	1.01095	0.978129
	1.00928	0.980089
	1.00925	0.978392
	1.01042	0.979786
	1.01001	0.979203
	1.01062	0.979251
	1.00919	0.981074
	1.00928	0.979206
	1.01076	0.978085
	1.00976	0.978371
	1.00972	0.97751
	1.00966	0.98079
	1.00903	0.977111
	1.00881	0.97948
	1.00949	0.977556
	1.01026	0.980833
	1.0098	0.978489
	1.00921	0.979457
	1.00862	0.979999
	1.0087	0.978483
	1.00929	0.980044
	1.00905	0.976116
	1.00987	0.978693
	1.00971	0.980033
	1.00932	0.978087
	1.00939	0.978522
	1.00947	0.97925
	1.00874	0.981108
	1.00784	0.979598
	1.00921	0.978951
	1.0087	0.983223
	1.00829	0.981856
	1.0085	0.983299
	1.0097	0.979571
	1.00841	0.981212
	1.00939	0.980529
	1.00911	0.980281
	1.00913	0.979801
	1.00853	0.979079
	1.00891	0.981453
	1.00884	0.977655
	1.00869	0.977538
	1.00913	0.980221
	1.00887	0.979421
	1.00837	0.980956
	1.00915	0.979917
	1.00866	0.980001
	1.00758	0.97947
	1.00743	0.981428
	1.00835	0.981964
	1.00799	0.979755
	1.00869	0.980203
	1.00857	0.978588
	1.00821	0.979339
	1.00838	0.979332
	1.00781	0.979836
	1.00866	0.980088
	1.00833	0.979185
	1.00728	0.981003
	1.00737	0.981062
	1.00707	0.98195
	1.00845	0.981413
	1.00821	0.980506
	1.00832	0.982312
	1.00776	0.98136
	1.00787	0.980834
	1.00779	0.977535
	1.00855	0.978856
	1.00766	0.97712
	1.00795	0.978323
	1.00866	0.978946
	1.00962	0.979673
	1.00888	0.982402
	1.00794	0.9829
	1.00721	0.98109
	1.00831	0.981807
	1.00787	0.981792
	1.00756	0.97968
	1.00836	0.983799
	1.00802	0.983945
	1.00804	0.983066
	1.00798	0.98215
	1.00706	0.982317
	1.00786	0.978977
	1.00847	0.980579
	1.00845	0.981682
	1.00763	0.980975
	1.00829	0.981708
	1.00756	0.982491
	1.0069	0.983802
	1.007	0.981733
	1.00739	0.980143
	1.00779	0.982457
	1.00708	0.983916
	1.00741	0.984439
	1.00671	0.983006
	1.0073	0.983677
	1.00711	0.980376
	1.00878	0.979936
	1.00751	0.981706
	1.00663	0.980401
	1.00682	0.981371
	1.0074	0.981732
	1.00714	0.981891
	1.00683	0.98224
	1.00768	0.982792
	1.00728	0.982728
	1.00736	0.982153
	1.00675	0.980679
	1.00613	0.980509
	1.00762	0.981302
	1.00773	0.981916
	1.00737	0.9814
	1.00707	0.982092
	1.00741	0.979374
	1.00753	0.981532
	1.00677	0.980015
	1.00731	0.980412
	1.00705	0.982506
	1.00664	0.980435
	1.00719	0.982893
	1.00755	0.982145
	1.00668	0.981592
	1.00721	0.981498
	1.00798	0.981552
	1.00681	0.981111
	1.00707	0.979001
	1.00778	0.979096
	1.00822	0.979892
	1.00709	0.977867
	1.00668	0.978874
	1.00637	0.980326
	1.00608	0.981828
	1.00863	0.98065
	1.00753	0.983724
	1.00614	0.982722
	1.00575	0.983077
	1.00719	0.982241
	1.00774	0.983121
	1.0066	0.983196
	1.00664	0.982028
	1.00687	0.982278
	1.00687	0.979806
	1.00664	0.983031
	1.00611	0.981708
	1.00629	0.984427
	1.00521	0.980874
	1.00683	0.982365
	1.00684	0.984894
	1.00698	0.983949
	1.00609	0.985775
	1.0068	0.985389
	1.0063	0.986922
	1.00559	0.983964
	1.00611	0.985012
	1.00612	0.985059
	1.00646	0.982281
	1.00682	0.983454
	1.00618	0.98315
	1.00606	0.983698
	1.0061	0.982618
	1.0061	0.981165
	1.00716	0.981255
	1.00692	0.981907
	1.00588	0.982049
	1.00606	0.982252
	1.0062	0.985872
	1.00565	0.981874
	1.0058	0.985229
	1.00633	0.983064
	1.00557	0.981006
	1.00636	0.98181
	1.00596	0.981152
	1.00496	0.979319
	1.00641	0.981265
	1.00661	0.980828
	1.00535	0.982717
	1.00606	0.981274
	1.00597	0.984475
	1.00616	0.980451
	1.00707	0.982252
	1.00513	0.985778
	1.00605	0.98333
	1.00544	0.984965
	1.00534	0.982262
	1.00478	0.983614
	1.00524	0.983309
	1.00646	0.98375
	1.00636	0.982822
	1.00551	0.982524
	1.0058	0.983107
	1.00579	0.981792
	1.00552	0.981853
	1.00593	0.985537
	1.00516	0.980678
	1.00522	0.980801
	1.00519	0.98381
	1.00558	0.982436
	1.00546	0.98402
	1.00547	0.986164
	1.00531	0.985098
	1.00477	0.982455
	1.00507	0.982424
	1.00524	0.98259
	1.00495	0.985031
	1.0047	0.980403
	1.0045	0.98495
	1.0046	0.984691
	1.00475	0.984605
	1.00624	0.983453
	1.00525	0.984509
	1.0053	0.983466
	1.00567	0.985603
	1.0058	0.98792
	1.00541	0.986173
	1.0055	0.983047
	1.00495	0.982123
	1.00525	0.983317
	1.00493	0.982837
	1.00499	0.985283
	1.00498	0.984733
	1.00539	0.983593
	1.00473	0.985096
	1.00445	0.986612
	1.00437	0.989323
	1.0048	0.986267
	1.00519	0.98608
	1.0059	0.985383
	1.00605	0.984921
	1.00501	0.985896
	1.00459	0.984528
	1.00489	0.983105
	1.00354	0.984753
	1.00395	0.9864
	1.00565	0.985754
	1.00554	0.985097
	1.00583	0.986653
	1.00591	0.985685
	1.00562	0.98615
	1.00518	0.983955
	1.00471	0.987877
	1.00371	0.985774
	1.0045	0.98513
	1.00491	0.987179
	1.00455	0.984845
	1.00453	0.984668
	1.00503	0.982233
	1.00584	0.983961
	1.00466	0.98473
	1.0046	0.985853
	1.00592	0.983736
	1.00565	0.983712
	1.00479	0.985224
	1.00448	0.984024
	1.00504	0.985901
	1.00487	0.987653
	1.00435	0.987608
	1.00553	0.987746
	1.00514	0.988694
	1.00515	0.988085
	1.00465	0.98508
	1.00453	0.987753
	1.00327	0.982972
	1.00475	0.983344
	1.00502	0.985578
	1.00441	0.986583
	1.00486	0.985206
	1.00417	0.986153
	1.004	0.985625
	1.00545	0.985758
	1.00504	0.988983
	1.00424	0.985998
	1.0047	0.98819
	1.00404	0.987474
	1.00456	0.98754
	1.00545	0.986369
	1.00469	0.984434
	1.00388	0.984598
	1.00398	0.983194
	1.00535	0.986411
	1.00523	0.98486
	1.00546	0.98359
	1.00465	0.986106
	1.00445	0.985955
	1.00428	0.985786
	1.00554	0.985695
	1.00474	0.985174
	1.00519	0.98708
	1.00426	0.988691
	1.00389	0.988447
	1.00371	0.984685
	1.00471	0.984776
	1.00477	0.984028
	1.00362	0.984464
	1.00418	0.9883
	1.00532	0.983782
	1.00483	0.988988
	1.00229	0.987913
	1.00283	0.988284
	1.00294	0.988307
	1.00398	0.987355
	1.00359	0.989416
	1.00452	0.988425
	1.00462	0.987428
	1.00434	0.987654
	1.00395	0.987433
	1.00332	0.986399
	1.00389	0.984504
	1.00314	0.986826
	1.00341	0.985946
	1.0036	0.986641
	1.00279	0.986109
	1.00376	0.984625
	1.00427	0.987522
	1.00517	0.987293
	1.00348	0.987688
	1.00267	0.988299
	1.00294	0.985482
	1.00351	0.988783
	1.00326	0.986839
	1.00316	0.98861
	1.00395	0.986635
	1.00388	0.987621
	1.00394	0.985143
	1.00483	0.988154
	1.0035	0.986072
	1.00475	0.985065
	1.00427	0.989858
	1.00393	0.986646
	1.00389	0.989837
	1.00343	0.989303
	1.00263	0.991372
	1.00402	0.989825
	1.00414	0.987547
	1.00422	0.987761
	1.00407	0.987387
	1.00519	0.986341
	1.00397	0.987878
	1.00342	0.984535
	1.00331	0.985822
	1.00332	0.98683
	1.00434	0.989253
	1.00424	0.987916
	1.00344	0.989406
	1.00383	0.988792
	1.00478	0.989379
	1.00338	0.991125
	1.00354	0.989584
	1.00388	0.988981
	1.0028	0.988029
	1.00335	0.985047
	1.00379	0.987137
	1.00336	0.988133
	1.00343	0.990388
	1.00237	0.987287
	1.00357	0.988374
	1.00352	0.985827
	1.00415	0.989343
	1.00377	0.990028
	1.00375	0.988667
	1.00188	0.988905
	1.00251	0.989994
	1.00311	0.988752
	1.00331	0.988559
	1.00334	0.985988
	1.00259	0.989169
	1.00301	0.988591
	1.00234	0.988755
	1.00217	0.98792
	1.00361	0.986319
	1.00302	0.988941
	1.00429	0.988731
	1.00273	0.987924
	1.00196	0.990061
	1.00215	0.988893
	1.00335	0.990832
	1.0031	0.988412
	1.00282	0.990121
	1.00352	0.988687
	1.00335	0.987609
	1.00274	0.98744
	1.00359	0.987758
	1.00309	0.989035
	1.00243	0.986875
	1.00377	0.990022
	1.00378	0.986115
	1.0032	0.98904
	1.00243	0.986311
	1.00236	0.989438
	1.00312	0.988292
	1.00254	0.98727
	1.00254	0.988891
	1.00257	0.98994
	1.00356	0.989553
	1.00345	0.988715
	1.00331	0.985948
	1.00361	0.985878
	1.00397	0.987517
	1.00331	0.985917
	1.00254	0.985922
	1.00391	0.988512
	1.00256	0.986528
	1.0021	0.990227
	1.00211	0.988316
	1.00279	0.990027
	1.00322	0.988294
	1.0024	0.98827
	1.0023	0.987547
	1.00358	0.990328
	1.00378	0.987281
	1.00272	0.985095
	1.00338	0.984471
	1.00343	0.988064
	1.00166	0.986267
	1.0017	0.986956
	1.00154	0.986575
	1.00249	0.98709
	1.00345	0.990383
	1.00312	0.986872
	1.00262	0.987121
	1.00248	0.986749
	1.00269	0.987434
	1.0029	0.986331
	1.00308	0.988668
	1.00294	0.986891
	1.00308	0.985134
	1.00273	0.986296
	1.00344	0.985927
	1.00302	0.983037
	1.00205	0.987411
	1.00232	0.986315
	1.00355	0.988648
	1.00286	0.988368
	1.00323	0.989791
	1.00281	0.985623
	1.00321	0.987685
	1.00225	0.986379
	1.00151	0.987427
	1.00226	0.986545
	1.00308	0.988335
	1.0028	0.987361
	1.00236	0.988105
	1.00352	0.988301
	1.00277	0.985987
	1.00255	0.986405
	1.0021	0.987275
	1.00113	0.988309
	1.00112	0.989142
	1.00272	0.989531
	1.0022	0.99202
	1.00237	0.990026
	1.00273	0.991417
	1.00249	0.98985
	1.00286	0.98827
	1.00215	0.990156
	1.00219	0.987227
	1.00199	0.987437
	1.00307	0.988682
	1.00313	0.990014
	1.00229	0.988621
	1.00177	0.985816
	1.00334	0.98697
	1.00151	0.988715
	1.0025	0.989179
	1.00231	0.987543
	1.00282	0.992582
	1.00175	0.990922
	1.00184	0.993201
	1.00172	0.990996
	1.00133	0.990799
	1.0017	0.988515
	1.00267	0.987379
	1.00265	0.988476
	1.00237	0.98754
	1.00116	0.992901
	1.00107	0.989631
	1.00159	0.989791
	1.00226	0.989686
	1.00164	0.991337
	1.00147	0.989865
	1.00258	0.991267
	1.0012	0.989948
	1.00134	0.990612
	1.00163	0.987821
	1.00196	0.989025
	1.00256	0.990123
	1.0032	0.989981
	1.00305	0.991037
	1.004	0.987932
	1.00235	0.990321
	1.0014	0.988725
	1.00207	0.991748
	1.00212	0.990806
	1.00281	0.990719
	1.00162	0.990971
	1.00107	0.993447
	1.00151	0.990289
	1.00237	0.992371
	1.00186	0.990842
	1.00087	0.988533
	1.00143	0.988999
	1.00189	0.989014
	1.00138	0.989237
	1.00105	0.986239
	1.00192	0.989384
	1.00074	0.98893
	1.00121	0.989758
	1.00087	0.99114
	1.00118	0.992797
	1.0007	0.990778
	1.00154	0.991071
	1.00108	0.992738
	1.00301	0.990665
	1.00147	0.989942
	1.00199	0.988925
	1.0014	0.988955
	1.00129	0.990993
	1.00177	0.988706
	1.00141	0.989024
	1.00175	0.989649
	1.00088	0.988657
	1.00141	0.990264
	1.00154	0.991601
	1.00219	0.991978
	1.00133	0.98904
	1.00115	0.989682
	1.00087	0.988696
	1.00151	0.987488
	1.00044	0.990765
	1.00221	0.988973
	1.00117	0.988052
	1.00028	0.987365
	1.0016	0.988406
	1.00262	0.988714
	1.0017	0.99003
	1.00197	0.990933
	1.00047	0.98963
	1.00124	0.992323
	1.0015	0.989373
	1.00145	0.991696
	1.00082	0.992636
	1.00141	0.991031
	1.00119	0.989942
	1.00157	0.988564
	0.999899	0.991389
	1.00122	0.989835
	1.00228	0.987892
	1.00096	0.991163
	1.0006	0.989766
	1.00196	0.991235
	1.00264	0.992715
	1.00198	0.989653
	1.00218	0.991497
	1.00134	0.990798
	1.00098	0.991582
	1.00078	0.991768
	1.00108	0.990906
	1.00088	0.988689
	1.00127	0.988726
	1.00118	0.989672
	1.0018	0.989193
	1.00192	0.990621
	1.0007	0.990942
	1.0009	0.989058
	1.00043	0.988887
	1.0002	0.991457
	1.00099	0.989901
	1.00146	0.989436
	1.00173	0.993954
	1.00021	0.990665
	1.00017	0.99265
	1.00022	0.992898
	1.00075	0.990379
	1.00105	0.988526
	0.999628	0.991733
	1.00174	0.991683
	1.00175	0.992612
	1.00117	0.990268
	1.00179	0.990652
	1.00121	0.991548
	1.00027	0.992165
	1.00057	0.990912
	1.00134	0.990529
	1.00076	0.992644
	1.00051	0.99182
	0.999906	0.992895
	1.00057	0.990005
	1.00083	0.987696
	0.999578	0.989093
	1.00054	0.989093
	1.00085	0.99145
	1.00195	0.989982
	1.00089	0.991937
	1.00046	0.990998
	1.00096	0.990661
	1.00034	0.990208
	1.00006	0.988553
	1.00069	0.991865
	1.00089	0.992299
	1.00111	0.992436
	1.00014	0.992675
	1.00059	0.990227
	1.00071	0.990106
	1.00081	0.989684
	1.00081	0.990673
	1.00119	0.990353
	1.00113	0.992624
	1.00026	0.989637
	0.999882	0.992433
	1.00076	0.992414
	1.00014	0.993811
	1.00006	0.993735
	1.00092	0.994154
	0.999838	0.991782
	0.99962	0.993725
	1	0.990285
	1.00011	0.993052
	1.0014	0.988935
	1.00124	0.991675
	0.999346	0.989561
	0.999658	0.989544
	1.00055	0.987112
	1.00005	0.990607
	1.0001	0.991879
	1.00014	0.992974
	1.00111	0.990765
	1.00136	0.990648
	1.00094	0.993645
	1.00119	0.992853
	1.0004	0.990835
	0.999569	0.993636
	1.00019	0.989425
	1.00058	0.990217
	0.999867	0.988711
	1.00063	0.990089
	1.00017	0.990075
	0.999919	0.990066
	1.00119	0.991057
	1.00075	0.994302
	1.00038	0.992381
	1.00045	0.994444
	1.00094	0.993277
	1.00112	0.992616
	1.00154	0.992496
	1.00072	0.992859
	0.999548	0.993533
	1.00014	0.99115
	1.00089	0.991754
	0.999899	0.991047
	1.00017	0.991272
	0.999906	0.990318
	1.0004	0.991694
	0.999454	0.99242
	1.00098	0.994875
	1.00036	0.993385
	0.998948	0.994554
	1.00045	0.991883
	1.00062	0.993317
	0.999837	0.993281
	0.999551	0.99468
	1.00037	0.993631
	1.00083	0.993117
	1.00097	0.992352
	0.999605	0.992972
	0.999631	0.99501
	0.999899	0.994732
	0.999812	0.994873
	0.999553	0.991916
	0.999917	0.991847
	1.00104	0.992936
	0.999619	0.992933
	1.00003	0.99559
	1.00062	0.993054
	0.999727	0.994529
	1.00037	0.991886
	1.00019	0.992593
	1.00081	0.992929
	1.00019	0.991723
	1.00086	0.994435
	1.00053	0.989408
	0.99906	0.990703
	0.998966	0.992666
	0.999784	0.993167
	1.00045	0.993182
	0.999714	0.989105
	1.001	0.992504
	1.00002	0.993835
	1.00027	0.995403
	1.00076	0.993836
	0.999272	0.991972
	1.00012	0.991364
	0.999419	0.9926
	0.999882	0.993821
	0.999729	0.992248
	0.999561	0.993417
	0.999142	0.99093
	0.999046	0.992683
	1.00011	0.996177
	0.999663	0.993815
	0.999349	0.994318
	0.999163	0.993493
	0.999878	0.994011
	0.999405	0.994906
	0.999531	0.99608
	0.998088	0.993029
	0.998655	0.992799
	0.999891	0.994725
	0.999701	0.992336
	1.00015	0.994506
	1.00012	0.992419
	0.998885	0.994309
	0.998815	0.993991
	0.999484	0.991922
	0.999783	0.994058
	0.999908	0.99354
	1.00009	0.994188
	1.00074	0.993982
	1.00047	0.995298
	0.999879	0.99492
	0.998133	0.993125
	0.998784	0.994869
	0.999725	0.993144
	0.9985	0.99587
	0.998016	0.994725
	0.999436	0.994228
	1.00043	0.995832
	1.00018	0.995066
	1.00018	0.996496
	1.00007	0.993722
	0.998761	0.997824
	0.998844	0.995023
	0.999364	0.997441
	0.999273	0.99594
	0.99913	0.995577
	0.999216	0.994416
	0.998882	0.99319
	0.998714	0.994884
	1.00026	0.993596
	0.999991	0.99474
	0.999302	0.993837
	0.999617	0.994703
	0.998675	0.995309
	0.999531	0.997547
	0.998668	0.995442
	0.998927	0.998224
	0.999443	0.99562
	0.999185	0.99452
	0.998684	0.995544
	0.998255	0.995652
	0.998789	0.993217
	0.999363	0.992794
	0.999609	0.994396
	0.99903	0.99392
	1.00007	0.991464
	0.998894	0.993431
	0.998956	0.993421
	0.997758	0.996215
	0.997977	0.995005
	0.998803	0.997481
	0.999153	0.993967
	0.999689	0.997919
	0.999068	0.997206
	0.999718	0.996517
	0.999305	0.997224
	0.997888	0.993367
	0.998286	0.994019
	0.998511	0.99441
	0.999393	0.992747
	0.998486	0.992087
	0.998539	0.996116
	0.998802	0.994353
	0.999384	0.994648
	1.00022	0.993385
	0.998921	0.996352
	0.99828	0.994373
	0.997966	0.99715
	0.998351	0.998074
	0.998852	0.996709
	0.999849	0.995186
	0.998129	0.993644
	0.998696	0.993651
	0.999713	0.994928
	0.999174	0.998352
	0.998618	0.99275
	0.998845	0.99457
	0.998821	0.994584
	0.998588	0.995233
	0.998375	0.994641
	0.997279	0.995364
	0.99938	0.994596
	0.998952	0.99507
	0.998258	0.997878
	0.998897	0.997454
	0.998681	0.996633
	0.998174	0.996365
	0.997865	0.996024
	0.997727	0.995482
	0.997908	0.995443
	0.998184	0.996483
	0.998762	0.994112
	0.999501	0.996489
	0.997985	0.998233
	0.999634	0.997836
	0.999391	0.995992
	0.998831	0.996413
	0.998959	0.995779
	0.997552	0.996375
	0.998543	0.997467
	0.998121	0.997446
	0.998308	0.996469
	0.998036	0.994974
	0.997882	0.994342
	0.998284	0.994387
	0.997757	0.994136
	0.998324	0.998417
	0.998899	0.995813
	0.998437	0.998432
	0.997917	0.995122
	0.99819	0.997997
	0.999329	0.995347
	0.999416	0.996783
	0.998976	0.994828
	0.998604	0.99538
	0.99822	0.99506
	0.998396	0.995843
	0.998461	0.996795
	0.99912	0.993753
	0.998265	0.996783
	0.998222	0.995593
	0.997166	0.995682
	0.998023	0.9978
	0.99869	0.998569
	0.999054	0.997567
	0.998951	0.995872
	0.998047	1.00056
	0.997717	0.997824
	0.998405	0.999765
	1.01154	1.01168
	1.00976	1.01156
	1.00988	1.00752
	1.00919	1.01066
	1.00863	1.00752
	1.00813	1.00551
	1.00776	1.00523
	1.00779	1.00595
	1.00732	1.00644
	1.00707	1.00624
	1.00758	1.00868
	1.00818	1.00395
	1.00664	1.00437
	1.0067	1.00299
	1.00636	1.00262
	1.00607	1.00328
	1.00527	1.00271
	1.00639	1.00296
	1.00622	1.00506
	1.00575	1.00257
	1.00552	1.00307
	1.00595	1.0014
	1.00588	1.00313
	1.00626	1.00248
	1.00442	1.00438
	1.00598	1.00314
	1.00627	1.00234
	1.00596	1.00531
	1.0058	1.0031
	1.00512	1.00581
	1.00476	1.00424
	1.00461	1.00048
	1.00469	1.00083
	1.00525	1.00095
	1.00531	1.00082
	1.00499	1.00315
	1.0061	1.00321
	1.00588	1.00082
	1.00453	0.999229
	1.0036	1.00065
	1.00391	1.00217
	1.00492	1.00332
	1.00472	1.00278
	1.00419	1.00307
	1.00496	1.00288
	1.00495	1.00313
	1.00463	1.00361
	1.00431	1.00173
	1.00372	1.00024
	1.00416	0.999988
	1.00334	1.00003
	1.00271	0.999661
	1.00433	0.999436
	1.00359	1.0016
	1.00451	1.00177
	1.0052	1.00238
	1.00413	1.00275
	1.00389	1.00178
	1.00328	1.00356
	1.00322	1.00281
	1.00364	1.00496
	1.00295	1.00215
	1.00392	1.00084
	1.00298	1.00194
	1.00276	1.00116
	1.0034	1.00171
	1.00295	1.00184
	1.00267	0.998331
	1.00322	1.00309
	1.00381	1.00134
	1.00392	1.00132
	1.00347	0.998723
	1.00386	1.00388
	1.00285	1.00243
	1.00261	1.00388
	1.00302	1.00219
	1.00262	1.00149
	1.00261	1.00136
	1.00389	1.00421
	1.00278	1.00273
	1.00225	1.00404
	1.0021	1.00114
	1.00301	1.00268
	1.00206	1.00164
	1.00333	1.00435
	1.00318	1.00201
	1.00293	1.00029
	1.00268	1.00197
	1.0023	1.00095
	1.00199	1.00404
	1.0027	1.00281
	1.00216	1.00276
	1.00232	1.0016
	1.00189	1.00259
	1.00164	1.00248
	1.00197	1.00098
	1.00155	1.00173
	1.00167	1.00203
	1.00321	1.00203
	1.00316	1.00431
	1.00339	1.00089
	1.00304	1.00281
	1.00358	1.00277
	1.0031	1.00485
	1.00208	1.00366
	1.00203	1.00071
	1.0019	1.00297
	1.00295	1.00141
	1.00235	1.00362
	1.00142	1.00093
	1.00116	1.0032
	1.00201	1.00214
	1.00154	1.00323
	1.00189	1.00392
	1.00237	1.00327
	1.00195	1.004
	1.00226	1.00322
	1.00207	1.0023
	1.0021	1.00386
	1.00228	1.00406
	1.00134	1.00262
	1.0016	0.999975
	1.00166	1.00189
	1.00057	1.00001
	1.00197	1.002
	1.00146	1.001
	1.00129	1.00145
	1.00037	1.0033
	1.00147	1.0044
	1.0005	1.00382
	1.00097	1.00428
	1.00074	1.00303
	1.00132	1.00496
	1.0015	1.00385
	1.0011	1.00265
	1.00181	1.00148
	1.00177	0.999692
	1.00092	1.00316
	1.00052	1.00301
	1.00037	1.00316
	1.00061	1.00291
	1.00173	1.00164
	1.00152	1.00136
	1.00197	1.00207
	1.00048	1.00248
	1.00068	1.00284
	1.00113	1.00332
	1.00067	1.00448
	1.00192	1.0038
	1.00133	1.00359
	1.00037	1.00534
	1.00072	1.00254
	1.00071	0.998872
	1.00067	1.00359
	1.00066	1.00153
	0.999843	1.00219
	1.00082	1.00179
	1.00085	1.00439
[truncated: 16,014 more rows]
