# Supplementary material for: Cold induces brain region-selective cell activity-dependent lipid metabolism
Source: eLife. 2025 Jan 30;13:RP98353. doi: 10.7554/eLife.98353 (PMC11781799; doi:10.7554/eLife.98353)
Supplement: Figure 8—source data 1. [file elife-98353-fig8-data1.xlsx]

## Sheet: Figure 8-source data 1
	Figure-8A				Figure-8B								Figure 8C								Figure 8D
					Time (min)	Animal 1	Animal 2	Animal 3	Animal 4				Time (min)	Animal 1	Animal 2	Animal 3	Animal 4				Time (min)	Animal 1	Animal 2	Animal 3	Animal 4
	0.439272				0	0.993958	1.00257	0.996717	0.999837				0	1.00082	1.00125	1.00094	1.00122				0	1.00895	1.00116	0.988115	0.996276
	0.438749					0.998477	0.997655	0.996801	0.999113					1.00077	1.00124	0.997387	0.999375					0.99823	0.999887	1.00506	0.993175
	0.437448					1.00757	0.999774	1.00648	1.00105					0.998413	0.997513	1.00168	0.999401					0.992817	0.998954	1.00682	1.01055
	0.436285					1.01635	1.00006	1.008	0.997849					0.995616	0.995206	1.0069	1.0008					0.992776	0.994053	1.01826	0.993117
	0.436722					1.01267	1.00327	1.01469	0.995096					0.991289	0.988837	1.01184	1.00213					0.994532	0.993934	1.00034	1.00324
	0.436324					1.02641	1.00769	1.0212	0.992827					1.00696	0.995836	1.01432	1.00214					0.99614	0.991122	1.00023	1.00336
	0.435735				30	1.04104	1.0136	1.02891	1.00228				30	1.01508	1.01129	1.01798	1.00266				30	1.0008	0.990451	0.963997	1.00459
	0.436212					1.03976	1.03882	1.0302	1.00844					1.02404	1.02666	1.0213	1.00341					1.00169	0.988941	0.946903	1.00896
	0.435429					1.07775	1.0527	1.03786	1.02485					1.03289	1.04206	1.02396	1.00403					1.00453	0.988425	0.945054	0.997507
	0.436965					1.10122	1.06856	1.04019	1.05076					1.04203	1.05332	1.0249	1.00322					1.00844	0.987993	0.951747	1.00517
	0.436816					1.12991	1.08048	1.04958	1.06875					1.03723	1.05499	1.03029	1.00349					1.0096	0.986388	0.949745	1.01582
	0.435279					1.15637	1.09625	1.05026	1.08987					1.03391	1.05128	1.0304	1.00195					1.01433	0.984864	0.945948	1.01144
	0.435115				60	1.15527	1.08991	1.06501	1.08865				60	1.04256	1.05497	1.03889	1.00266				60	1.01866	0.983973	0.949725	1.00727
	0.435679					1.14678	1.08361	1.07038	1.07891					1.04203	1.05992	1.04044	1.00273					1.01697	0.982792	0.956667	1.00389
	0.435129					1.16001	1.0906	1.06996	1.10065					1.03296	1.05613	1.04184	1.00258					1.02019	0.980668	0.950958	1.01699
	0.434835					1.16465	1.09692	1.08904	1.09016					1.03233	1.05071	1.04201	1.0012					1.02093	0.979216	0.954993	1.01826
	0.434302					1.1891	1.11297	1.09914	1.07568					1.04251	1.05519	1.04507	0.999898					1.02461	0.975088	0.955123	1.01184
	0.434789					1.20509	1.12147	1.11643	1.08969					1.03304	1.05872	1.04643	0.998462					1.026	0.97393	0.955238	1.0137
	0.434488				90	1.21884	1.1348	1.12212	1.10019				90	1.02549	1.05771	1.05038	0.997294				90	1.03169	0.974101	0.958649	1.01346
	0.43493					1.25209	1.15	1.13794	1.07829					1.0241	1.05463	1.05073	0.996224					1.03689	0.974603	0.962461	1.01245
	0.434771
	0.434814
	0.434908
	0.43613
	0.433845
	0.433692
	0.434747
	0.434482
	0.433744
	0.434441
	0.434626
	0.434295
	0.433984
	0.4337
	0.433601
	0.433323
	0.433455
	0.433376
	0.433487
	0.432817
	0.433107
	0.433525
	0.433879
	0.433362
	0.433113
	0.433377
	0.433596
	0.433098
	0.433564
	0.432433
	0.433232
	0.433782
	0.432272
	0.432925
	0.433132
	0.433049
	0.433276
	0.434156
	0.433334
	0.432915
	0.431239
	0.432512
	0.432567
	0.432933
	0.432581
	0.432061
	0.432603
	0.432529
	0.432699
	0.432576
	0.432655
	0.432948
	0.4333
	0.432785
	0.433506
	0.433333
	0.433519
	0.433297
	0.432682
	0.431984
	0.432327
	0.431809
	0.43032
	0.431751
	0.432181
	0.433329
	0.433617
	0.433314
	0.432856
	0.432393
	0.432445
	0.432914
	0.432006
	0.431877
	0.432001
	0.432599
	0.433552
	0.432924
	0.432367
	0.432286
	0.432757
	0.431982
	0.431652
	0.432448
	0.432735
	0.431956
	0.43222
	0.432763
	0.431907
	0.431446
	0.430983
	0.431217
	0.431728
	0.432013
	0.431937
	0.432634
	0.43241
	0.43228
	0.433006
	0.431796
	0.431419
	0.432141
	0.432077
	0.432018
	0.432201
	0.431807
	0.431173
	0.431943
	0.432883
	0.431922
	0.432563
	0.432979
	0.432007
	0.432655
	0.431788
	0.432079
	0.432753
	0.431953
	0.431121
	0.431217
	0.432032
	0.432134
	0.431893
	0.431883
	0.431954
	0.431137
	0.432206
	0.431645
	0.431043
	0.431675
	0.431931
	0.431593
	0.431843
	0.430234
	0.430459
	0.430862
	0.43176
	0.432108
	0.431357
	0.431259
	0.431244
	0.432208
	0.432239
	0.431074
	0.431326
	0.432006
	0.431364
	0.430774
	0.432299
	0.431388
	0.431362
	0.43121
	0.431457
	0.431249
	0.431037
	0.430902
	0.430538
	0.43068
	0.430945
	0.431823
	0.431944
	0.430747
	0.431163
	0.431422
	0.431802
	0.431384
	0.431134
	0.431531
	0.431089
	0.43088
	0.43057
	0.432002
	0.431687
	0.430982
	0.430645
	0.430624
	0.431072
	0.430896
	0.43216
	0.430879
	0.432171
	0.431564
	0.43063
	0.431871
	0.431344
	0.430872
	0.43183
	0.430899
	0.430911
	0.431726
	0.431429
	0.431435
	0.431073
	0.431315
	0.431009
	0.430677
	0.431614
	0.431753
	0.431535
	0.431179
	0.431022
	0.431984
	0.430864
	0.431073
	0.431665
	0.431909
	0.430826
	0.430249
	0.430665
	0.431188
	0.432457
	0.430917
	0.430554
	0.430846
	0.431624
	0.431802
	0.431385
	0.430689
	0.43114
	0.43033
	0.430827
	0.431884
	0.432067
	0.430675
	0.4303
	0.430432
	0.431204
	0.430818
	0.430867
	0.431184
	0.431327
	0.431731
	0.430562
	0.430961
	0.430794
	0.430484
	0.431103
	0.432014
	0.430908
	0.430744
	0.43166
	0.431991
	0.431551
	0.43028
	0.430546
	0.430146
	0.430569
	0.431626
	0.431049
	0.431158
	0.430122
	0.429556
	0.429984
	0.431679
	0.431891
	0.431813
	0.43127
	0.430601
	0.431097
	0.431108
	0.430833
	0.430794
	0.430086
	0.430441
	0.430648
	0.430403
	0.430792
	0.43034
	0.429633
	0.430588
	0.430558
	0.431155
	0.43088
	0.430487
	0.431317
	0.430605
	0.42993
	0.430721
	0.431555
	0.430504
	0.430347
	0.430313
	0.429968
	0.430502
	0.430144
	0.431153
	0.431076
	0.430294
	0.430501
	0.430829
	0.430797
	0.430317
	0.430022
	0.430975
	0.430487
	0.431239
	0.431604
	0.43116
	0.431292
	0.430652
	0.430231
	0.430568
	0.430992
	0.430896
	0.431015
	0.430664
	0.430817
	0.429663
	0.429714
	0.430449
	0.431002
	0.430231
	0.431845
	0.431584
	0.431022
	0.431255
	0.43133
	0.430549
	0.42942
	0.43029
	0.430397
	0.42983
	0.430085
	0.430834
	0.430629
	0.430865
	0.430524
	0.431435
	0.430688
	0.429863
	0.430206
	0.430008
	0.430069
	0.430904
	0.429869
	0.430341
	0.430378
	0.430094
	0.430093
	0.430907
	0.430975
	0.430372
	0.429849
	0.429828
	0.429786
	0.431161
	0.430217
	0.431038
	0.430787
	0.43042
	0.430487
	0.430086
	0.430582
	0.430971
	0.430224
	0.430284
	0.429762
	0.429306
	0.431029
	0.430774
	0.429652
	0.430325
	0.429963
	0.429739
	0.430453
	0.430594
	0.430294
	0.430051
	0.429998
	0.430594
	0.430373
	0.42948
	0.430096
	0.430617
	0.430121
	0.431368
	0.430396
	0.430098
	0.430433
	0.430729
	0.431072
	0.430089
	0.429813
	0.429569
	0.429692
	0.430511
	0.43008
	0.429668
	0.429948
	0.430072
	0.429693
	0.429864
	0.429903
	0.429749
	0.42912
	0.429501
	0.429989
	0.429346
	0.429479
	0.430268
	0.431143
	0.430919
	0.429298
	0.429887
	0.430322
	0.430367
	0.430955
	0.42988
	0.429669
	0.430313
	0.430059
	0.429735
	0.430423
	0.429878
	0.430337
	0.430842
	0.429796
	0.429254
	0.429809
	0.430341
	0.430212
	0.430465
	0.430274
	0.430588
	0.430979
	0.430703
	0.429379
	0.429535
	0.429164
	0.429789
	0.429629
	0.428528
	0.430523
	0.42991
	0.428865
	0.430208
	0.430648
	0.430892
	0.430633
	0.429972
	0.429806
	0.429785
	0.429965
	0.430914
	0.430176
	0.430036
	0.4295
	0.428613
	0.429169
	0.430656
	0.430067
	0.429846
	0.429718
	0.430237
	0.430202
	0.430633
	0.429792
	0.43055
	0.431374
	0.430159
	0.428972
	0.429664
	0.430795
	0.430124
	0.429024
	0.431086
	0.430984
	0.430509
	0.429725
	0.429628
	0.429601
	0.429253
	0.429812
	0.429792
	0.428896
	0.42959
	0.429553
	0.429769
	0.429429
	0.429843
	0.430252
	0.430157
	0.430234
	0.429895
	0.42957
	0.430001
	0.430601
	0.430171
	0.429218
	0.430066
	0.430275
	0.429872
	0.429474
	0.429918
	0.429648
	0.429466
	0.429143
	0.429734
	0.430579
	0.430418
	0.430006
	0.430017
	0.429249
	0.429009
	0.429397
	0.430707
	0.430568
	0.429703
	0.429801
	0.429694
	0.429394
	0.428649
	0.429773
	0.429848
	0.429482
	0.428832
	0.428693
	0.429373
	0.429412
	0.429379
	0.42921
	0.429027
	0.43013
	0.429822
	0.429918
	0.429623
	0.429626
	0.429164
	0.428214
	0.429364
	0.429597
	0.429052
	0.429828
	0.429477
	0.430956
	0.429384
	0.429205
	0.429848
	0.429599
	0.429633
	0.428559
	0.429849
	0.429413
	0.429687
	0.428666
	0.428263
	0.429614
	0.428597
	0.428539
	0.429973
	0.429822
	0.428269
	0.429146
	0.43005
	0.429552
	0.425777
	0.427903
	0.429144
	0.430188
	0.429423
	0.429569
	0.42923
	0.429933
	0.428804
	0.429638
	0.429931
	0.42998
	0.428417
	0.428994
	0.429051
	0.429597
	0.429952
	0.429562
	0.429082
	0.430262
	0.429946
	0.428946
	0.429501
	0.429483
	0.42982
	0.429247
	0.429408
	0.429485
	0.429411
	0.429048
	0.42984
	0.430472
	0.4307
	0.430291
	0.429417
	0.42922
	0.428857
	0.429718
	0.42988
	0.430685
	0.43039
	0.430086
	0.429388
	0.428327
	0.429745
	0.429848
	0.429517
	0.42946
	0.429402
	0.429873
	0.429769
	0.429227
	0.429568
	0.428712
	0.42944
	0.42963
	0.429038
	0.429202
	0.428952
	0.429476
	0.429593
	0.429843
	0.429658
	0.428819
	0.428536
	0.429872
	0.429146
	0.430028
	0.429445
	0.429804
	0.428688
	0.428802
	0.429634
	0.429818
	0.429961
	0.429979
	0.429509
	0.429583
	0.429054
	0.428815
	0.428509
	0.429704
	0.429636
	0.429611
	0.428897
	0.429942
	0.430187
	0.429789
	0.428903
	0.42893
	0.428519
	0.429236
	0.428575
	0.429604
	0.428671
	0.428744
	0.429088
	0.429893
	0.430024
	0.429647
	0.429445
	0.429987
	0.429696
	0.429789
	0.429442
	0.429233
	0.428807
	0.429382
	0.429702
	0.428708
	0.428231
	0.428788
	0.429183
	0.428136
	0.428912
	0.429736
	0.429277
	0.429383
	0.429197
	0.429246
	0.428859
	0.42855
	0.429818
	0.429693
	0.42953
	0.430138
	0.430711
	0.429716
	0.428967
	0.428866
	0.429252
	0.429689
	0.429597
	0.429868
	0.429404
	0.429336
	0.429142
	0.429496
	0.429238
	0.428598
	0.429061
	0.42911
	0.429486
	0.428655
	0.428704
	0.42986
	0.428647
	0.427876
	0.429317
	0.429034
	0.428802
	0.429078
	0.428868
	0.4295
	0.428608
	0.42891
	0.429353
	0.428117
	0.429557
	0.430596
	0.429603
	0.429062
	0.428535
	0.428939
	0.429202
	0.428933
	0.428822
	0.429077
	0.429523
	0.430368
	0.429774
	0.429187
	0.429308
	0.428501
	0.429527
	0.429001
	0.428493
	0.429063
	0.429371
	0.429365
	0.42876
	0.429307
	0.429388
	0.428923
	0.428871
	0.428806
	0.429985
	0.429898
	0.429441
	0.428751
	0.429732
	0.428342
	0.428565
	0.429385
	0.428153
	0.429011
	0.429515
	0.429712
	0.43027
	0.430233
	0.429525
	0.428628
	0.428824
	0.429106
	0.42867
	0.429883
	0.429151
	0.428589
	0.429384
	0.429359
	0.428904
	0.428648
	0.429442
	0.429511
	0.428359
	0.428745
	0.429842
	0.43035
	0.429811
	0.429547
	0.429413
	0.430022
	0.430389
	0.428015
	0.429569
	0.429661
	0.428767
	0.4284
	0.428326
	0.428261
	0.428537
	0.428562
	0.429299
	0.429211
	0.42965
	0.429022
	0.428629
	0.428821
	0.429595
	0.429309
	0.429662
	0.429122
	0.428917
	0.428563
	0.428515
	0.428773
	0.428788
	0.429112
	0.428339
	0.428349
	0.428963
	0.428518
	0.428735
	0.429097
	0.42921
	0.429253
	0.428621
	0.428927
	0.428862
	0.429003
	0.429146
	0.429241
	0.429201
	0.429781
	0.429275
	0.429594
	0.429669
	0.429487
	0.429644
	0.429255
	0.427998
	0.428211
	0.4287
	0.428169
	0.429299
	0.428429
	0.428355
	0.42882
	0.428611
	0.429019
	0.429532
	0.428625
	0.428844
	0.428648
	0.428968
	0.42866
	0.428497
	0.428951
	0.429226
	0.428501
	0.428923
	0.429437
	0.428372
	0.42888
	0.428692
	0.428619
	0.429126
	0.42682
	0.428747
	0.429545
	0.42876
	0.428925
	0.428055
	0.429257
	0.429155
	0.427649
	0.429081
	0.428986
	0.428897
	0.428381
	0.429169
	0.429451
	0.429615
	0.429726
	0.428891
	0.429112
	0.428184
	0.428244
	0.429001
	0.428432
	0.428814
	0.429308
	0.428591
	0.428418
	0.42844
	0.428306
	0.429057
	0.428555
	0.428758
	0.428919
	0.428425
	0.428662
	0.428966
	0.428829
	0.429692
	0.429281
	0.429335
	0.428647
	0.429376
	0.428878
	0.429247
	0.429806
	0.428958
	0.428156
	0.42883
	0.428273
	0.428735
	0.427953
	0.429124
	0.428992
	0.428547
	0.428967
	0.428801
	0.428587
	0.428904
	0.429311
	0.428659
	0.428479
	0.428178
	0.427777
	0.427649
	0.427984
	0.428112
	0.429634
	0.429489
	0.42838
	0.428347
	0.436001
	0.435878
	0.435859
	0.436236
	0.435881
	0.435605
	0.435403
	0.434877
	0.435475
	0.435869
	0.435083
	0.434186
	0.434736
	0.433935
	0.433837
	0.434061
	0.434485
	0.4343
	0.433686
	0.434295
	0.434091
	0.433188
	0.434455
	0.433754
	0.433467
	0.434095
	0.434557
	0.434171
	0.434008
	0.433686
	0.432859
	0.433125
	0.432883
	0.432411
	0.433447
	0.433155
	0.433493
	0.433508
	0.433016
	0.433244
	0.433415
	0.432908
	0.43321
	0.43336
	0.433276
	0.432995
	0.433482
	0.433203
	0.433274
	0.432886
	0.432954
	0.433814
	0.43309
	0.433211
	0.43251
	0.432396
	0.432261
	0.432836
	0.432717
	0.432444
	0.432477
	0.433025
	0.432078
	0.431444
	0.431448
	0.432621
	0.431623
	0.432837
	0.433319
	0.432795
	0.432375
	0.431312
	0.432137
	0.431444
	0.431758
	0.431663
	0.431778
	0.432429
	0.432683
	0.433738
	0.43333
	0.432706
	0.432269
	0.432042
	0.432715
	0.432585
	0.432118
	0.432248
	0.432631
	0.431922
	0.431968
	0.432421
	0.432474
	0.432161
	0.432412
	0.433027
	0.433212
	0.433192
	0.432395
	0.431172
	0.431856
	0.43186
	0.431995
	0.431242
	0.431272
	0.432022
	0.431868
	0.431658
	0.432272
	0.43239
	0.432384
	0.431926
	0.431677
	0.432014
	0.43181
	0.431333
	0.432145
	0.431665
	0.430553
	0.432046
	0.431734
	0.431949
	0.432501
	0.430763
	0.43122
	0.432274
	0.432146
	0.431673
	0.431059
	0.431066
	0.4322
	0.431876
	0.431703
	0.431602
	0.431345
	0.431098
	0.432024
	0.431684
	0.431615
	0.432223
	0.431904
	0.432685
	0.431553
	0.430409
	0.432136
	0.432615
	0.432228
	0.431795
	0.431028
	0.430933
	0.431912
	0.432232
	0.431857
	0.430442
	0.431014
	0.43168
	0.431227
	0.430992
	0.431254
	0.430451
	0.430707
	0.431158
	0.431358
	0.43058
	0.430673
	0.431493
	0.431806
	0.43079
	0.431499
	0.43133
	0.430973
	0.431528
	0.431337
	0.431148
	0.430147
	0.429501
	0.429216
	0.430598
	0.432015
	0.431732
	0.430773
	0.430305
	0.43061
	0.431244
	0.431325
	0.431214
	0.431125
	0.430945
	0.431253
	0.431013
	0.431753
	0.43115
	0.43077
	0.430554
	0.430873
	0.431274
	0.431313
	0.430766
	0.429963
	0.430009
	0.431016
	0.43151
	0.431349
	0.431528
	0.431619
	0.430827
	0.431396
	0.431309
	0.430599
	0.430517
	0.431253
	0.43165
	0.430816
	0.431521
	0.430878
	0.430814
	0.431605
	0.431184
	0.431252
	0.431242
	0.431271
	0.431553
	0.431653
	0.430506
	0.430905
	0.43146
	0.430479
	0.430879
	0.432066
	0.432317
	0.431329
	0.430806
	0.431375
	0.431084
	0.430667
	0.430513
	0.430193
	0.430589
	0.430909
	0.431157
	0.430828
	0.430314
	0.431538
	0.431437
	0.4308
	0.430624
	0.431503
	0.432666
	0.431482
	0.430646
	0.431198
	0.43188
	0.43065
	0.431111
	0.431668
	0.431686
	0.43161
	0.431703
	0.431722
	0.431413
	0.430833
	0.431444
	0.431029
	0.431567
	0.431234
	0.431199
	0.430735
	0.430725
	0.431334
	0.432026
	0.431321
	0.430527
	0.430877
	0.430612
	0.430689
	0.43161
	0.430524
	0.431779
	0.431554
	0.43064
	0.431477
	0.431382
	0.430703
	0.431705
	0.4315
	0.431252
	0.430842
	0.430432
	0.432032
	0.431551
	0.431058
	0.431062
	0.432087
	0.431804
	0.431473
	0.43123
	0.431021
	0.430873
	0.43025
	0.431442
	0.431436
	0.431737
	0.431422
	0.430853
	0.431112
	0.431232
	0.431863
	0.431205
	0.431104
	0.431372
	0.430782
	0.43146
	0.430653
	0.431111
	0.431099
	0.430178
	0.430155
	0.430588
	0.431037
	0.431394
	0.432005
	0.431937
	0.431284
	0.431386
	0.431006
	0.431423
	0.431024
	0.430907
	0.431213
	0.431698
	0.430614
	0.430823
	0.430741
	0.429999
	0.429923
	0.430622
	0.43049
	0.430497
	0.430317
	0.43109
	0.431235
	0.430761
	0.430623
	0.431015
	0.430457
	0.431354
	0.431691
	0.430317
	0.430668
	0.430506
	0.430816
	0.430111
	0.430384
	0.43015
	0.429476
	0.430954
	0.431286
	0.430863
	0.430339
	0.430241
	0.430424
	0.430369
	0.430464
	0.430074
	0.430683
	0.429954
	0.430124
	0.430497
	0.430572
	0.429786
	0.430888
	0.430979
	0.430014
	0.429963
	0.429716
	0.429775
	0.429554
	0.430224
	0.429492
	0.429736
	0.429881
	0.430877
	0.429965
	0.430118
	0.431873
	0.430328
	0.430548
	0.430427
	0.430306
	0.430206
	0.431345
	0.430802
	0.430589
	0.43009
	0.429115
	0.429618
	0.429809
	0.430246
	0.430887
	0.430999
	0.431143
	0.429871
	0.43069
	0.430425
	0.431205
	0.431016
	0.430301
	0.430706
	0.431222
	0.431006
	0.430663
	0.43037
	0.430225
	0.430315
	0.430429
	0.430275
	0.430273
	0.430429
	0.430182
	0.429872
	0.430077
	0.430476
	0.430877
	0.429968
	0.430986
	0.429488
	0.430012
	0.43051
	0.430245
	0.430159
	0.430169
	0.430232
	0.430335
	0.430367
	0.429234
	0.429438
	0.430924
	0.429704
	0.430058
	0.42861
	0.42977
	0.429819
	0.430517
	0.429623
	0.430305
	0.429966
	0.428856
	0.429417
	0.429945
	0.42963
	0.430139
	0.429775
	0.430422
	0.430494
	0.430298
	0.430547
	0.430299
	0.429998
	0.429767
	0.43003
	0.42987
	0.429246
	0.430135
	0.42958
	0.429501
	0.429674
	0.429044
	0.429265
	0.429661
	0.429396
	0.429928
	0.429758
	0.429854
	0.429546
	0.429518
	0.429769
	0.430014
	0.430541
	0.429401
	0.429769
	0.429965
	0.429433
	0.429586
	0.428775
	0.429125
	0.429039
	0.429675
	0.429401
	0.429858
	0.42942
	0.429125
	0.42929
	0.429058
	0.429409
	0.430148
	0.429332
	0.429611
	0.429414
	0.429871
	0.42955
	0.430188
	0.428561
	0.428827
	0.430081
	0.428443
	0.428513
	0.428997
	0.430015
	0.428742
	0.429038
	0.428609
	0.428519
	0.42917
	0.429584
	0.429594
	0.430108
	0.429656
	0.428552
	0.428439
	0.428698
	0.428303
	0.429156
	0.429004
	0.428922
	0.428637
	0.427999
	0.428636
	0.42824
	0.428477
	0.428878
	0.429054
	0.429268
	0.428927
	0.429338
	0.42923
	0.429074
	0.429138
	0.429791
	0.429281
	0.430087
	0.430442
	0.429628
	0.429298
	0.429161
	0.428439
	0.429028
	0.428929
	0.428534
	0.429812
	0.429599
	0.430093
	0.43014
	0.430248
	0.429637
	0.429888
	0.429194
	0.4299
	0.428998
	0.429293
	0.4297
	0.430112
	0.4295
	0.42886
	0.429021
	0.428675
	0.430513
	0.430137
	0.429793
	0.429584
	0.430548
	0.429897
	0.429922
	0.428979
	0.430852
	0.4298
	0.429132
	0.429201
	0.4285
	0.42894
	0.429073
	0.428947
	0.429859
	0.42849
	0.42975
	0.428237
	0.428686
	0.429005
	0.42986
	0.428662
	0.428959
	0.428714
	0.428676
	0.429835
	0.429393
	0.429224
	0.42949
	0.428415
	0.428362
	0.428894
	0.429025
	0.429271
	0.428247
	0.429065
	0.429116
	0.430028
	0.42885
	0.428923
	0.427887
	0.428683
	0.428384
	0.428755
	0.428181
	0.42785
	0.428352
	0.428696
	0.429064
	0.429153
	0.429093
	0.428739
	0.428918
	0.428733
	0.428661
	0.428904
	0.429207
	0.428311
	0.427788
	0.428946
	0.43008
	0.428803
	0.428607
	0.428997
	0.430026
	0.429621
	0.428802
	0.429121
	0.428505
	0.429117
	0.428974
	0.428677
	0.429268
	0.429093
	0.429724
	0.428525
	0.429396
	0.429207
	0.428376
	0.428782
	0.428094
	0.429014
	0.428855
	0.427983
	0.429072
	0.429456
	0.429006
	0.428223
	0.429502
	0.429291
	0.428578
	0.428546
	0.429305
	0.428501
	0.428138
	0.427956
	0.428932
	0.428187
	0.428568
	0.428132
	0.42849
	0.428444
	0.428029
	0.428291
	0.429277
	0.429664
	0.429004
	0.428808
	0.429123
	0.428205
	0.427759
	0.428759
	0.428773
	0.42809
	0.42832
	0.428567
	0.428942
	0.428924
	0.428531
	0.428906
	0.428899
	0.429095
	0.429545
	0.428596
	0.428223
	0.429493
	0.428913
	0.428677
	0.429168
	0.429119
	0.429091
	0.429113
	0.42801
	0.428129
	0.429084
	0.42859
	0.428937
	0.429401
	0.429547
	0.428925
	0.428522
	0.427918
	0.428622
	0.428917
	0.428247
	0.428241
	0.428187
	0.427743
	0.428381
	0.428263
	0.428813
	0.428284
	0.428431
	0.427722
	0.428679
	0.428826
	0.428499
	0.428487
	0.428448
	0.428692
	0.428841
	0.429387
	0.42959
	0.42884
	0.427999
	0.428848
	0.42825
	0.428032
	0.428798
	0.428736
	0.428313
	0.428802
	0.429074
	0.428534
	0.428199
	0.428871
	0.428048
	0.429051
	0.428781
	0.428891
	0.428649
	0.428646
	0.42812
	0.428029
	0.427425
	0.428214
	0.428294
	0.428794
	0.429395
	0.428614
	0.428536
	0.428404
	0.428986
	0.429308
	0.428509
	0.42834
	0.428856
	0.429413
	0.428375
	0.428127
	0.427807
	0.428551
	0.428429
	0.427855
	0.428015
	0.42765
	0.428018
	0.428459
	0.428684
	0.428417
	0.427275
	0.427012
	0.427978
	0.428542
	0.427915
	0.428832
	0.428375
	0.428702
	0.428479
	0.427333
	0.427808
	0.427959
	0.42786
	0.427922
	0.42801
	0.428283
	0.427842
	0.429042
	0.428644
	0.428067
	0.428473
	0.427943
	0.428788
	0.428154
	0.42839
	0.428142
	0.42775
	0.427493
	0.428606
	0.428813
	0.428532
	0.428227
	0.428575
	0.42836
	0.427959
	0.428292
	0.428612
	0.429112
	0.428797
	0.428909
	0.42765
	0.427907
	0.428814
	0.4283
	0.429031
	0.428669
	0.427988
	0.428459
	0.427926
	0.428013
	0.429264
	0.428593
	0.428101
	0.429279
	0.429366
	0.428917
	0.428804
	0.428681
	0.428676
	0.428219
	0.42705
	0.428546
	0.42925
	0.428232
	0.429118
	0.428657
	0.429015
	0.428998
	0.428267
	0.428385
	0.428951
	0.430116
	0.429063
	0.428349
	0.428669
	0.428994
	0.428736
	0.428525
	0.427011
	0.427877
	0.428796
	0.428503
	0.428656
	0.429057
	0.428204
	0.427505
	0.428351
	0.428215
	0.428849
	0.428614
	0.427936
	0.428736
	0.428287
	0.428389
	0.42854
	0.428517
	0.42834
	0.428704
	0.428722
	0.428084
	0.427954
	0.427778
	0.429211
	0.429118
	0.428934
	0.428852
	0.427922
	0.428479
	0.427835
	0.427892
	0.427778
	0.428031
	0.428133
	0.427763
	0.428276
	0.42853
	0.429116
	0.428613
	0.428837
	0.428995
	0.428628
	0.428464
	0.42889
	0.429078
	0.429404
	0.428671
	0.429367
	0.42774
	0.428107
	0.428743
	0.428343
	0.428194
	0.427693
	0.42703
	0.428389
	0.428129
	0.428456
	0.428373
	0.428586
	0.428114
	0.428124
	0.428351
	0.427722
	0.428786
	0.428474
	0.428351
	0.428225
	0.428345
	0.427582
	0.427972
	0.427053
	0.42808
	0.427195
	0.428061
	0.427511
	0.427062
	0.427329
	0.427956
	0.428365
	0.427565
	0.427717
	0.427301
	0.427647
	0.428785
	0.427938
	0.427411
	0.42727
	0.428337
	0.428322
	0.427722
	0.438287
	0.438618
	0.437512
	0.437696
	0.436953
	0.436653
	0.436052
	0.436197
	0.435844
	0.436209
	0.435764
	0.435544
	0.434909
	0.435226
	0.434271
	0.433285
	0.434578
	0.434614
	0.434307
	0.434121
	0.433716
	0.433901
	0.434562
	0.433613
	0.433311
	0.434389
	0.434314
	0.433738
	0.433822
	0.433922
	0.433716
	0.432621
	0.433435
	0.434251
	0.433698
	0.433289
	0.433353
	0.433485
	0.433952
	0.433071
	0.433674
	0.433495
	0.433101
	0.432666
	0.432648
	0.433271
	0.432783
	0.433144
	0.433189
	0.431321
	0.43285
	0.432734
	0.431933
	0.432647
	0.432466
	0.432985
	0.43314
	0.432768
	0.433164
	0.43312
	0.432382
	0.432021
	0.432819
	0.432458
	0.432235
	0.432645
	0.433597
	0.433065
	0.432724
	0.432071
	0.432635
	0.432528
	0.432462
	0.43353
	0.43273
	0.433123
	0.432508
	0.431962
	0.431698
	0.432555
	0.432301
	0.431862
	0.431361
	0.432075
	0.432008
	0.43256
	0.433268
	0.431858
	0.431829
	0.432219
	0.432042
	0.432439
	0.431563
	0.43151
	0.43193
	0.432218
	0.431247
	0.432971
	0.432836
	0.432282
	0.432271
	0.432757
	0.432269
	0.432716
	0.431783
	0.431215
	0.431795
	0.432118
	0.431847
[truncated: 17,353 more rows]
