# Supplementary material for: Cold induces brain region-selective cell activity-dependent lipid metabolism
Source: eLife. 2025 Jan 30;13:RP98353. doi: 10.7554/eLife.98353 (PMC11781799; doi:10.7554/eLife.98353)
Supplement: Figure 9—source data 1. [file elife-98353-fig9-data1.xlsx]

## Sheet: Figure 9-source data 1
	Figure-9A				Figure-9B								Figure 9C							Figure 9D
					Time (min)	Animal 1	Animal 2	Animal 3	Animal 4				Time (min)	Animal 1	Animal 2	Animal 3	Animal 4			Time (min)	Animal 1	Animal 2	Animal 3	Animal 4	Animal 5	Animal 6
	0.259189				0	1.0012	1.00122	0.997302	1.00011				0	0.991037	0.992188	0.993604	1.00934			0	0.997531	0.998456	0.993551	0.991798	1.01335	0.999244
	0.258621					0.999904	0.999451	0.99859	1.00067					1.00475	1.00194	1.00311	0.996767				1.00164	1.00037	1.00241	0.998825	1.00062	1.00228
	0.258703					0.998896	0.999326	1.00077	0.999218					1.00421	1.00587	1.00328	0.993896				1.00083	1.00118	1.00404	1.00938	0.986032	0.99848
	0.258195					1.00238	1.00431	1.00565	1.0044					1.00591	1.00767	1.00988	0.991866				0.995499	0.997239	0.994996	1.00545	0.973076	1.00231
	0.258757					1.02738	1.03206	1.02972	1.02337					1.00279	1.0055	1.00481	1.01512				1.01319	1.00402	1.00331	1.00243	0.960773	0.984976
	0.259077					1.05445	1.06249	1.04524	1.04962					0.997065	1.01056	0.99617	1.0439				1.02607	1.01685	1.01436	1.0112	0.952228	0.99299
	0.258277				30	1.0813	1.09293	1.06274	1.06942				30	0.998604	1.0227	0.985788	1.06888			30	1.04058	1.03894	1.00679	1.01547	0.942791	0.997534
	0.258313					1.10898	1.12349	1.07309	1.09136					1.00824	1.03924	0.979168	1.08142				1.06061	1.03942	0.997398	1.00858	0.934123	0.983186
	0.257723					1.10475	1.11668	1.06289	1.09814					1.01224	1.04384	0.976343	1.06427				1.08467	1.06609	1.00744	1.00596	0.925052	0.993386
	0.25858					1.08938	1.09916	1.04824	1.08557					1.0152	1.03915	0.977354	1.03556				1.09398	1.08171	1.02246	1.01157	0.915823	0.985032
	0.259296					1.10198	1.11621	1.05228	1.07741					1.01027	1.02721	0.981545	1.03669				1.08609	1.07638	1.02126	1.0165	0.908039	0.989495
	0.258822					1.11217	1.12493	1.06955	1.09697					1.01606	1.03587	0.980273	1.05599				1.0849	1.07309	1.01382	1.00963	0.90273	0.997924
	0.259026				60	1.10018	1.11215	1.06214	1.095				60	1.0202	1.0415	0.981398	1.03992			60	1.09145	1.08276	1.02512	1.00553	0.897499	0.986038
	0.258567					1.08429	1.09374	1.05417	1.08166					1.01767	1.02981	0.980166	1.00961				1.08745	1.08749	1.02958	1.01627	0.889438	0.996527
	0.258493					1.09414	1.11039	1.05446	1.07251					1.01144	1.01601	0.981779	1.00955				1.07801	1.07542	1.02252	1.01549	0.885514	1.00899
	0.258926					1.10838	1.12436	1.0857	1.08617					1.01158	1.02738	0.98284	1.04109				1.07672	1.06778	1.02258	1.01137	0.879638	0.987005
	0.259313					1.09387	1.10765	1.08149	1.09118					1.0161	1.04181	0.983478	1.03147				1.09384	1.07649	1.03599	1.00988	0.872544	1.00437
	0.259515					1.07664	1.08753	1.06464	1.07841					1.0155	1.02689	0.986824	1.00582				1.09019	1.07778	1.04317	1.00764	0.866358	0.996848
	0.259201				90	1.08828	1.10422	1.0486	1.06679				90	1.0101	1.01301	0.984921	0.985664			90	1.08316	1.07085	1.04331	1.00636	0.861848	0.996736
	0.258653													1.00262	1.01419	0.985903	1.02799
	0.259066
	0.259127
	0.259132
	0.258803
	0.258944
	0.258843
	0.258587
	0.25918
	0.258713
	0.258898
	0.259053
	0.257702
	0.258802
	0.259443
	0.25927
	0.259115
	0.259345
	0.259627
	0.259245
	0.259102
	0.259405
	0.258599
	0.259053
	0.259264
	0.259035
	0.258637
	0.258463
	0.259615
	0.259376
	0.25906
	0.258539
	0.26045
	0.259074
	0.260277
	0.259665
	0.259325
	0.258713
	0.259825
	0.259108
	0.259059
	0.259613
	0.259648
	0.259456
	0.258947
	0.259231
	0.25969
	0.259492
	0.259455
	0.260473
	0.259248
	0.259443
	0.259836
	0.259395
	0.258916
	0.259564
	0.259652
	0.259144
	0.259159
	0.25937
	0.259628
	0.258486
	0.258516
	0.258567
	0.258778
	0.258554
	0.258735
	0.259246
	0.25951
	0.259363
	0.259284
	0.259066
	0.259101
	0.259006
	0.259116
	0.259411
	0.259285
	0.259261
	0.259096
	0.258526
	0.258801
	0.259666
	0.259778
	0.259812
	0.259455
	0.259187
	0.260614
	0.259683
	0.259074
	0.259631
	0.258836
	0.259568
	0.259171
	0.259749
	0.259103
	0.25932
	0.260288
	0.260402
	0.259356
	0.259433
	0.259293
	0.259768
	0.258816
	0.25917
	0.259174
	0.260141
	0.260436
	0.259908
	0.260401
	0.259024
	0.258838
	0.259794
	0.259962
	0.259088
	0.258578
	0.25924
	0.259652
	0.259137
	0.259374
	0.259364
	0.25918
	0.259191
	0.258999
	0.258552
	0.259563
	0.25953
	0.258644
	0.259076
	0.259167
	0.259024
	0.258991
	0.259617
	0.258996
	0.259302
	0.259396
	0.259196
	0.259651
	0.259849
	0.260486
	0.259984
	0.258613
	0.25949
	0.259557
	0.259944
	0.259298
	0.259399
	0.259937
	0.259044
	0.259715
	0.259667
	0.258944
	0.259474
	0.259694
	0.259796
	0.259381
	0.259606
	0.259554
	0.258679
	0.259513
	0.259721
	0.260231
	0.259699
	0.26017
	0.260074
	0.259159
	0.259172
	0.260034
	0.260223
	0.258931
	0.25861
	0.259347
	0.258857
	0.258931
	0.259054
	0.259302
	0.260404
	0.259691
	0.259455
	0.259453
	0.259804
	0.258648
	0.259969
	0.259725
	0.259933
	0.259109
	0.259087
	0.259714
	0.259137
	0.259168
	0.25975
	0.259449
	0.258715
	0.259743
	0.25953
	0.259698
	0.259429
	0.260589
	0.259286
	0.259902
	0.259658
	0.259614
	0.259251
	0.259462
	0.259115
	0.259674
	0.259044
	0.259143
	0.259413
	0.259957
	0.259746
	0.2595
	0.259888
	0.259951
	0.259689
	0.25865
	0.259328
	0.259557
	0.259942
	0.260459
	0.259087
	0.259096
	0.259251
	0.259159
	0.259244
	0.25873
	0.259423
	0.26013
	0.259677
	0.259281
	0.258414
	0.258764
	0.259386
	0.258841
	0.259429
	0.25965
	0.260309
	0.259106
	0.260085
	0.259216
	0.258674
	0.259771
	0.259581
	0.25934
	0.258871
	0.259841
	0.259697
	0.259376
	0.259433
	0.25822
	0.258009
	0.259276
	0.258867
	0.259493
	0.258926
	0.259164
	0.259381
	0.259695
	0.25965
	0.259595
	0.259284
	0.258888
	0.259384
	0.259683
	0.258953
	0.259411
	0.260265
	0.259257
	0.259155
	0.259887
	0.259383
	0.258241
	0.258805
	0.25921
	0.259677
	0.25918
	0.259885
	0.259803
	0.259547
	0.259639
	0.259567
	0.259064
	0.259031
	0.259557
	0.25975
	0.259698
	0.259369
	0.259022
	0.259416
	0.259287
	0.259558
	0.260024
	0.258964
	0.258864
	0.25972
	0.259344
	0.25913
	0.259339
	0.25918
	0.259532
	0.2593
	0.259633
	0.259574
	0.259269
	0.259769
	0.259546
	0.259689
	0.259638
	0.259415
	0.258896
	0.259064
	0.259052
	0.25971
	0.258533
	0.259682
	0.260502
	0.260044
	0.259232
	0.25909
	0.259362
	0.259186
	0.258983
	0.258974
	0.258791
	0.258891
	0.260268
	0.259985
	0.260113
	0.258534
	0.259677
	0.258896
	0.259843
	0.259214
	0.259147
	0.259451
	0.259578
	0.259384
	0.259396
	0.2594
	0.25984
	0.25989
	0.260686
	0.259956
	0.259206
	0.259008
	0.259503
	0.259756
	0.259842
	0.259494
	0.258996
	0.259264
	0.259499
	0.258589
	0.259156
	0.259558
	0.259296
	0.259022
	0.259008
	0.259667
	0.25937
	0.259012
	0.258806
	0.259953
	0.259243
	0.259779
	0.258763
	0.260039
	0.258868
	0.259074
	0.25964
	0.259201
	0.258684
	0.258362
	0.259182
	0.259386
	0.259834
	0.258837
	0.258939
	0.258602
	0.259292
	0.259075
	0.259357
	0.25946
	0.259476
	0.259416
	0.259726
	0.259286
	0.258466
	0.259852
	0.259684
	0.26008
	0.260029
	0.258936
	0.259074
	0.259262
	0.259126
	0.259613
	0.259651
	0.258821
	0.258339
	0.259604
	0.259813
	0.258835
	0.258148
	0.259893
	0.25928
	0.258766
	0.259227
	0.2596
	0.259383
	0.259277
	0.25898
	0.258573
	0.259774
	0.259628
	0.25915
	0.258212
	0.25907
	0.26016
	0.260008
	0.259206
	0.259517
	0.259931
	0.259134
	0.260001
	0.259115
	0.259314
	0.2593
	0.259388
	0.258225
	0.258159
	0.258496
	0.259039
	0.259313
	0.258927
	0.259246
	0.259631
	0.260043
	0.259375
	0.259017
	0.259481
	0.259803
	0.259386
	0.259259
	0.258981
	0.259345
	0.259343
	0.259041
	0.259357
	0.262632
	0.259218
	0.259738
	0.258547
	0.259231
	0.260024
	0.259524
	0.25974
	0.259661
	0.259204
	0.258594
	0.258806
	0.259456
	0.259816
	0.260009
	0.259637
	0.259298
	0.259289
	0.259799
	0.259422
	0.259028
	0.258846
	0.259402
	0.259984
	0.25967
	0.259526
	0.258877
	0.258526
	0.259659
	0.259687
	0.259347
	0.259148
	0.259413
	0.259726
	0.259325
	0.258769
	0.259529
	0.258793
	0.259007
	0.259397
	0.259974
	0.259081
	0.259347
	0.259264
	0.259194
	0.259242
	0.259031
	0.259432
	0.259374
	0.259148
	0.258859
	0.258539
	0.25886
	0.259685
	0.259059
	0.259345
	0.259134
	0.259444
	0.259212
	0.259212
	0.258821
	0.25959
	0.258503
	0.259099
	0.259244
	0.259368
	0.259047
	0.260354
	0.259678
	0.259721
	0.259443
	0.259354
	0.259722
	0.259432
	0.259346
	0.259
	0.259132
	0.259915
	0.259082
	0.258947
	0.258999
	0.259493
	0.260273
	0.259153
	0.258863
	0.258887
	0.259021
	0.259205
	0.2594
	0.258873
	0.259372
	0.25959
	0.25994
	0.260543
	0.259354
	0.259343
	0.259356
	0.25836
	0.258853
	0.258648
	0.259152
	0.259691
	0.259322
	0.259513
	0.260019
	0.259862
	0.259882
	0.2586
	0.258973
	0.259191
	0.259558
	0.259817
	0.259662
	0.259503
	0.259356
	0.259429
	0.259735
	0.25899
	0.258937
	0.25885
	0.258258
	0.258825
	0.259382
	0.259292
	0.260014
	0.259959
	0.259457
	0.260269
	0.259464
	0.259754
	0.259413
	0.258865
	0.258925
	0.260012
	0.260021
	0.259223
	0.258958
	0.25905
	0.259256
	0.258926
	0.259052
	0.260322
	0.259322
	0.259709
	0.259287
	0.258816
	0.259259
	0.259469
	0.25924
	0.259532
	0.25971
	0.25976
	0.259177
	0.258666
	0.259071
	0.259312
	0.259663
	0.259619
	0.258964
	0.259303
	0.258925
	0.259149
	0.259518
	0.259232
	0.259636
	0.259372
	0.259405
	0.259628
	0.259256
	0.259053
	0.259211
	0.25932
	0.258761
	0.259765
	0.259959
	0.259487
	0.259172
	0.259007
	0.25964
	0.259399
	0.259479
	0.259276
	0.259255
	0.259247
	0.25984
	0.25952
	0.259957
	0.259595
	0.259396
	0.259154
	0.258893
	0.258789
	0.25923
	0.259572
	0.259957
	0.260891
	0.25912
	0.259723
	0.25912
	0.259791
	0.259782
	0.259776
	0.259982
	0.25996
	0.259396
	0.25929
	0.258746
	0.259333
	0.258399
	0.259039
	0.259584
	0.259578
	0.259448
	0.259837
	0.260171
	0.259979
	0.259447
	0.259403
	0.259403
	0.259118
	0.259495
	0.258579
	0.259089
	0.25947
	0.259229
	0.258798
	0.258999
	0.260249
	0.25944
	0.260047
	0.259248
	0.2588
	0.258664
	0.25934
	0.258975
	0.259295
	0.258884
	0.258843
	0.258963
	0.259548
	0.25871
	0.259563
	0.259185
	0.259627
	0.258624
	0.258698
	0.259435
	0.259115
	0.259857
	0.260059
	0.259594
	0.259871
	0.259559
	0.259543
	0.259635
	0.260052
	0.259033
	0.259271
	0.259125
	0.259766
	0.260001
	0.259836
	0.259922
	0.25858
	0.258792
	0.25879
	0.259434
	0.259719
	0.260331
	0.259902
	0.259837
	0.259957
	0.259788
	0.258946
	0.259838
	0.259392
	0.25954
	0.258907
	0.258401
	0.259136
	0.259375
	0.259055
	0.259506
	0.25923
	0.258546
	0.259521
	0.259056
	0.258897
	0.25989
	0.259722
	0.25975
	0.259634
	0.259274
	0.259423
	0.259648
	0.259584
	0.25941
	0.259614
	0.259706
	0.260026
	0.259425
	0.259211
	0.259707
	0.259453
	0.25885
	0.259199
	0.259903
	0.260076
	0.25879
	0.259397
	0.259013
	0.259462
	0.258559
	0.258712
	0.259296
	0.258893
	0.25918
	0.259439
	0.259359
	0.259145
	0.258203
	0.258821
	0.258955
	0.25893
	0.259034
	0.259035
	0.25919
	0.259256
	0.258856
	0.259509
	0.259807
	0.260006
	0.259185
	0.259187
	0.25959
	0.259719
	0.259345
	0.259345
	0.258888
	0.259475
	0.259617
	0.259206
	0.26002
	0.259176
	0.259267
	0.259318
	0.258617
	0.25926
	0.259832
	0.259034
	0.259779
	0.259653
	0.259278
	0.258896
	0.258976
	0.259986
	0.259333
	0.259694
	0.259274
	0.259476
	0.258781
	0.258786
	0.259198
	0.258922
	0.25915
	0.259121
	0.258678
	0.260025
	0.259698
	0.258523
	0.258566
	0.258733
	0.258909
	0.259041
	0.259439
	0.259183
	0.259116
	0.259202
	0.259486
	0.258873
	0.259122
	0.258971
	0.258873
	0.259727
	0.259928
	0.259606
	0.259596
	0.260146
	0.259839
	0.259029
	0.258926
	0.259484
	0.259592
	0.259216
	0.258338
	0.257948
	0.258105
	0.257991
	0.258895
	0.259447
	0.259388
	0.258994
	0.259027
	0.260015
	0.259464
	0.258961
	0.259394
	0.259649
	0.259635
	0.259881
	0.259284
	0.25881
	0.25906
	0.259371
	0.258937
	0.259671
	0.259759
	0.259406
	0.259955
	0.259316
	0.259186
	0.258583
	0.259621
	0.258986
	0.259258
	0.259423
	0.260021
	0.259781
	0.259727
	0.259439
	0.259523
	0.259118
	0.260002
	0.260482
	0.25941
	0.259695
	0.259094
	0.258486
	0.258861
	0.259307
	0.259396
	0.259046
	0.259812
	0.259299
	0.259507
	0.25884
	0.25842
	0.258386
	0.259691
	0.258788
	0.259488
	0.258931
	0.258501
	0.25792
	0.259608
	0.259142
	0.259051
	0.259614
	0.258897
	0.259335
	0.258782
	0.258319
	0.258562
	0.25944
	0.258948
	0.258886
	0.258846
	0.258987
	0.258977
	0.259233
	0.259783
	0.259242
	0.258023
	0.258306
	0.258704
	0.258698
	0.259526
	0.258581
	0.258149
	0.258289
	0.257862
	0.257686
	0.258287
	0.257501
	0.25753
	0.258277
	0.258831
	0.258827
	0.258726
	0.258535
	0.257779
	0.258473
	0.258434
	0.257627
	0.257354
	0.258305
	0.258279
	0.258776
	0.258118
	0.25834
	0.257779
	0.258448
	0.258732
	0.258849
	0.258415
	0.257925
	0.258273
	0.258309
	0.258806
	0.258605
	0.258177
	0.258538
	0.259284
	0.259062
	0.25872
	0.258562
	0.257786
	0.258117
	0.259026
	0.25863
	0.25863
	0.258526
	0.258259
	0.259573
	0.258587
	0.258708
	0.259048
	0.257832
	0.257863
	0.258765
	0.25847
	0.258438
	0.258277
	0.258599
	0.258229
	0.258645
	0.259087
	0.259145
	0.257892
	0.258429
	0.258454
	0.258703
	0.259026
	0.258553
	0.259352
	0.259262
	0.258304
	0.259544
	0.258316
	0.258498
	0.258077
	0.258174
	0.257889
	0.257694
	0.258647
	0.258556
	0.258659
	0.258834
	0.259265
	0.258976
	0.258581
	0.258662
	0.25873
	0.258274
	0.259275
	0.259013
	0.259096
	0.258678
	0.257951
	0.258107
	0.259341
	0.258952
	0.257966
	0.258589
	0.258929
	0.258789
	0.258165
	0.259623
	0.259954
	0.258677
	0.258629
	0.258951
	0.258662
	0.258624
	0.258542
	0.258806
	0.258663
	0.259163
	0.259707
	0.259296
	0.25787
	0.258398
	0.259095
	0.25928
	0.258602
	0.25882
	0.259524
	0.259348
	0.258873
	0.258103
	0.258321
	0.258442
	0.259516
	0.258868
	0.25913
	0.25857
	0.258347
	0.258596
	0.259169
	0.259146
	0.258622
	0.259406
	0.258446
	0.258796
	0.259378
	0.258799
	0.258653
	0.258852
	0.258581
	0.258136
	0.258636
	0.258793
	0.259205
	0.25859
	0.258779
	0.259095
	0.25921
	0.259355
	0.258861
	0.25892
	0.25858
	0.258822
	0.258576
	0.258867
	0.259154
	0.259149
	0.25866
	0.259556
	0.259302
	0.259323
	0.25831
	0.258875
	0.259716
	0.258238
	0.258598
	0.258356
	0.258323
	0.258836
	0.258618
	0.25875
	0.258776
	0.258685
	0.259782
	0.259068
	0.259281
	0.259019
	0.259282
	0.258621
	0.258851
	0.258671
	0.259345
	0.258865
	0.258477
	0.258506
	0.258957
	0.25982
	0.258368
	0.258602
	0.258538
	0.258368
	0.25856
	0.259501
	0.258959
	0.25983
	0.260187
	0.258781
	0.258665
	0.258855
	0.258452
	0.258236
	0.258555
	0.258824
	0.258673
	0.259027
	0.258942
	0.259354
	0.258837
	0.258908
	0.258228
	0.258399
	0.259415
	0.25967
	0.258932
	0.259153
	0.258426
	0.258543
	0.258837
	0.258501
	0.258768
	0.258609
	0.258383
	0.25851
	0.258708
	0.258858
	0.258467
	0.257926
	0.258686
	0.259519
	0.258841
	0.258206
	0.25916
	0.259004
	0.25898
	0.259162
	0.258952
	0.258563
	0.259294
	0.25903
	0.25884
	0.259469
	0.258077
	0.258428
	0.258807
	0.25908
	0.258062
	0.258662
	0.258592
	0.259119
	0.259928
	0.259649
	0.259624
	0.259607
	0.258414
	0.258454
	0.258755
	0.258894
	0.258873
	0.258732
	0.258786
	0.259274
	0.25878
	0.25906
	0.259584
	0.258843
	0.25832
	0.258997
	0.259082
	0.258436
	0.259416
	0.259884
	0.258763
	0.257858
	0.258343
	0.259054
	0.259287
	0.258374
	0.25878
	0.258811
	0.258938
	0.258401
	0.259288
	0.2592
	0.258964
	0.25893
	0.25848
	0.258941
	0.259391
	0.258645
	0.259702
	0.259141
	0.2596
	0.259494
	0.259022
	0.258843
	0.259709
	0.258983
	0.259009
	0.258886
	0.259072
	0.259059
	0.259209
	0.258643
	0.258774
	0.258515
	0.258632
	0.259058
	0.258541
	0.258886
	0.259302
	0.259004
	0.258973
	0.258169
	0.259586
	0.25939
	0.259865
	0.258683
	0.258723
	0.258976
	0.259434
	0.259111
	0.259418
	0.258968
	0.25908
	0.258723
	0.258459
	0.258259
	0.257658
	0.258394
	0.258641
	0.258598
	0.258994
	0.259236
	0.260265
	0.259241
	0.259283
	0.259186
	0.258885
	0.25921
	0.259094
	0.259557
	0.259373
	0.259192
	0.259187
	0.259671
	0.258774
	0.259402
	0.258916
	0.258784
	0.258853
	0.258661
	0.259587
	0.259267
	0.258002
	0.25891
	0.258865
	0.259403
	0.258579
	0.25882
	0.259236
	0.259035
	0.258671
	0.258933
	0.258715
	0.259033
	0.259877
	0.259359
	0.259489
	0.259473
	0.259426
	0.259217
	0.258543
	0.259234
	0.25863
	0.258364
	0.258925
	0.259573
	0.259271
	0.25908
	0.258728
	0.257736
	0.258831
	0.25915
	0.258815
	0.25927
	0.259904
	0.259759
	0.259491
	0.258912
	0.259076
	0.259456
	0.259577
	0.260137
	0.25955
	0.25916
	0.259438
	0.259415
	0.25888
	0.259722
	0.259293
	0.259703
	0.259376
	0.259364
	0.258269
	0.258651
	0.259351
	0.258601
	0.25822
	0.258722
	0.2583
	0.258982
	0.258871
	0.259546
	0.258715
	0.259338
	0.259471
	0.259262
	0.258857
	0.25856
	0.258762
	0.25798
	0.258461
	0.257987
	0.258356
	0.258801
	0.258341
	0.259187
	0.258955
	0.259881
	0.258719
	0.258978
	0.259216
	0.258233
	0.258698
	0.259128
	0.259039
	0.258676
	0.258492
	0.257992
	0.259312
	0.259056
	0.259461
	0.25884
	0.258961
	0.259082
	0.257769
	0.259553
	0.259379
	0.258848
	0.259357
	0.259146
	0.258349
	0.259026
	0.258519
	0.258811
	0.258931
	0.258663
	0.259134
	0.258881
	0.258755
	0.25887
	0.259482
	0.258961
	0.259033
	0.259119
	0.258628
	0.258815
	0.258368
	0.259154
	0.258088
	0.258626
	0.259368
	0.258973
	0.258764
	0.258685
	0.259284
	0.258548
	0.258646
	0.258935
	0.258592
	0.258953
	0.258331
	0.258309
	0.2582
	0.258312
	0.259066
	0.258911
	0.258899
	0.258482
	0.258938
	0.258857
	0.258734
	0.25812
	0.257954
	0.258174
	0.258484
	0.258536
	0.258765
	0.259259
	0.258327
	0.259795
	0.258932
	0.258445
	0.257978
	0.257741
	0.258273
	0.258403
	0.259866
	0.25886
	0.258975
	0.258981
	0.258936
	0.259304
	0.258997
	0.259076
	0.258478
	0.259385
	0.258712
	0.259085
	0.258977
	0.25941
	0.258978
	0.258366
	0.258236
	0.258989
	0.258623
	0.257531
	0.258496
	0.258773
	0.259993
	0.258847
	0.258571
	0.258701
	0.25879
	0.258958
	0.259454
	0.259293
	0.259164
	0.258148
	0.258492
	0.259308
	0.259473
	0.259284
	0.258656
	0.258825
	0.258446
	0.258847
	0.258855
	0.258773
	0.259275
	0.259332
	0.259394
	0.259357
	0.258386
	0.258459
	0.25895
	0.259068
	0.258778
	0.25835
	0.258129
	0.259286
	0.259177
	0.259483
	0.258828
	0.259285
	0.259136
	0.258398
	0.258153
	0.258351
	0.259505
	0.259261
	0.259392
	0.259131
	0.258709
	0.258343
	0.258321
	0.259216
	0.259706
	0.259325
	0.258968
	0.259446
	0.2587
	0.259005
	0.259302
	0.259426
	0.259464
	0.259241
	0.258913
	0.259052
	0.258535
	0.259487
	0.259205
	0.258448
	0.259013
	0.259288
	0.258881
	0.258967
	0.259304
	0.258811
	0.2592
	0.258554
	0.258318
	0.25869
	0.258681
	0.258314
	0.258131
	0.258703
	0.259191
	0.25822
	0.258762
	0.258286
	0.2593
	0.259042
	0.258834
	0.259079
	0.258655
	0.259038
	0.259864
	0.258638
	0.258696
	0.259286
	0.258753
	0.258481
	0.259541
	0.259418
	0.258818
	0.25853
	0.258851
	0.25901
	0.258555
	0.2596
	0.259326
	0.258214
	0.257752
	0.25898
	0.259503
	0.259203
	0.259084
	0.25852
	0.25805
	0.258967
	0.259104
	0.258297
	0.258966
	0.258585
	0.259146
	0.258448
	0.258187
	0.258603
	0.259046
	0.259266
	0.25937
	0.258607
	0.258351
	0.258858
	0.259443
	0.259347
	0.259133
	0.258739
	0.258452
	0.258083
	0.25809
	0.259114
	0.258429
	0.258986
	0.258792
	0.258453
	0.257892
	0.258959
	0.258447
	0.258305
	0.258534
	0.258823
	0.258523
	0.257911
	0.259129
	0.25929
	0.258415
	0.258248
	0.258868
	0.259187
	0.25793
	0.258975
	0.258589
	0.258145
	0.259072
	0.259276
	0.258588
	0.258852
	0.259213
	0.259747
	0.258596
	0.258638
	0.258918
	0.258974
	0.259433
	0.259058
	0.259273
	0.259437
	0.258556
	0.258813
	0.258884
	0.258499
	0.25917
	0.258268
	0.25874
	0.258935
	0.257955
	0.25865
	0.25785
	0.258245
	0.259531
	0.259388
	0.259262
	0.259111
	0.259034
	0.258966
	0.259831
	0.259481
	0.258307
	0.258415
	0.259216
	0.259356
	0.258873
	0.259146
	0.2589
	0.258985
	0.259929
	0.259211
	0.259258
	0.258231
	0.258441
	0.258606
	0.260071
	0.259491
	0.259007
	0.258709
	0.258953
	0.259513
	0.258344
	0.258949
	0.25925
	0.258918
	0.259311
	0.25882
	0.259292
	0.259037
	0.25881
	0.258472
	0.258564
	0.259848
	0.259673
	0.259277
	0.259268
	0.259296
	0.259375
	0.259115
	0.258906
	0.25882
	0.258743
	0.258197
	0.259125
	0.259535
	0.259007
	0.258699
	0.259119
	0.259503
	0.258517
	0.258718
	0.25909
	0.258786
	0.258634
	0.259196
	0.258936
	0.258455
	0.258303
	0.258404
	0.258881
	0.259033
	0.25799
	0.258272
	0.258705
	0.259002
	0.258554
	0.258939
	0.259278
	0.259413
	0.259058
	0.257835
	0.258891
	0.259385
	0.258887
	0.259945
	0.258937
	0.259109
	0.259128
	0.258749
	0.259711
	0.259936
	0.258833
	0.258323
	0.259018
	0.25898
	0.258602
	0.259018
	0.258644
	0.258672
	0.258712
	0.258683
	0.25948
	0.259067
	0.258914
	0.259313
	0.260183
	0.25951
	0.258677
	0.259102
	0.25948
	0.259164
	0.259018
	0.258793
	0.259748
	0.259277
	0.259197
	0.258564
	0.258872
	0.258835
	0.258966
	0.259106
	0.259183
	0.258872
	0.258118
	0.2589
	0.258884
	0.259764
	0.25923
	0.259227
	0.259166
	0.259022
	0.257971
	0.25854
	0.259827
	0.258583
	0.258093
	0.259669
	0.259186
	0.259082
	0.258903
	0.25891
	0.258167
	0.259281
	0.257393
	0.259066
	0.25949
	0.258896
	0.259889
	0.259484
	0.258734
	0.258193
	0.258549
	0.258805
	0.259195
	0.259223
	0.258959
	0.259147
	0.258651
	0.258429
	0.258487
	0.258718
	0.258828
	0.259579
	0.259862
	0.258838
	0.2587
	0.259079
	0.259422
	0.25859
	0.259412
	0.259252
	0.258304
	0.259051
	0.259098
	0.258467
	0.258607
	0.258082
	0.259208
	0.258882
	0.258868
	0.25857
	0.25927
	0.25835
	0.258343
	0.258471
	0.258832
	0.25876
	0.259029
	0.259332
	0.259178
	0.258734
	0.258654
	0.258348
	0.258522
	0.25934
	0.259673
	0.259106
	0.258731
	0.258473
	0.258918
	0.258373
	0.258551
	0.258452
	0.258606
	0.259018
	0.259121
	0.258677
	0.258931
	0.258355
	0.258218
	0.259095
	0.259306
	0.259338
	0.25906
	0.259294
	0.258484
	0.258691
	0.259087
	0.259801
	0.259093
	0.258317
	0.258867
	0.258844
	0.258917
	0.258697
	0.259074
	0.25816
	0.258672
	0.258429
	0.25803
	0.258039
	0.258158
	0.258861
	0.258355
	0.258849
	0.258465
	0.257786
	0.258044
	0.257767
	0.258085
	0.258844
	0.259429
	0.258834
	0.258856
	0.258723
	0.25825
	0.258166
	0.257863
	0.258153
	0.259116
	0.25929
	0.259149
	0.25838
	0.2584
	0.258827
	0.258244
	0.258358
	0.258304
	0.258687
	0.259027
	0.259493
	0.259063
	0.258924
	0.259334
	0.258959
	0.258602
	0.258145
	0.2585
	0.259274
	0.259166
	0.259709
	0.258865
	0.258799
	0.259117
	0.259436
	0.258959
	0.258664
	0.258018
	0.258162
	0.258795
	0.259144
	0.258596
	0.259109
	0.259197
	0.258014
	0.258971
	0.258594
	0.259169
	0.258828
	0.258602
	0.258889
	0.259687
	0.259172
	0.25909
	0.259046
	0.2586
	0.259386
	0.258915
	0.259104
	0.25923
	0.259717
	0.259534
	0.259388
	0.259581
	0.25851
	0.258917
	0.258517
	0.258879
	0.258519
	0.258759
	0.25944
	0.257851
	0.258374
	0.258299
	0.259105
	0.259448
	0.258787
	0.259285
	0.259197
	0.258364
	0.258429
	0.258726
	0.259173
	0.25928
	0.258977
	0.259215
	0.259554
	0.259299
	0.258868
	0.259246
	0.258934
	0.258938
	0.259033
	0.258487
	0.259293
	0.259079
	0.258969
	0.258949
	0.259476
	0.259051
	0.259183
	0.258569
	0.258925
	0.259121
[truncated: 16,405 more rows]
